# Supplementary material for: Monocyte metabolic transcriptional programs associate with resistance to tuberculin skin test/interferon-γ release assay conversion
Source: JCI journal article supplement (doi:10.1172/jci140073), 2021-06-10
Supplement: sd2 [file 2]

## Sheet: Table S3
Supplemental Table 3: Differentially expressed genes in whole blood, Uganda
RSTR vs. LTBI
	log2 fold-change (RSTR/LTBI)	AveExpr	P.Value	adj.P.Val
ZBTB20-AS1	-1.87123	-2.25258	0.00020626	0.999564
PPEF1	1.2266	-1.41558	0.00021696	0.999564
KAZALD1	1.40234	-3.29752	0.00038997	0.999564
TRPC5OS	-1.34821	-5.0818	0.0004055	0.999564
NIPAL2	2.5848	2.62998	0.0005492	0.999564
TMEM184A	-1.18178	-1.80981	0.00090427	0.999564
ADGRF3	-0.841604	-1.18851	0.00099146	0.999564
GGT1	0.536751	4.80583	0.00126518	0.999564
FLJ26850	2.36385	-3.34099	0.00157156	0.999564
C2orf61	1.57994	-3.9818	0.0016106	0.999564
NEU4	-1.59399	-3.61075	0.0016433	0.999564
BOC	-1.74931	-3.1499	0.00175075	0.999564
LINC01033	0.623004	-5.53304	0.00177249	0.999564
SLC26A4	-1.34157	-3.75642	0.00178537	0.999564
HAS1	1.57862	-2.17681	0.00194027	0.999564
KCNK15	0.737495	-5.40299	0.0020372	0.999564
KRT74	1.91735	-3.38373	0.00214799	0.999564
SETMAR	-0.290085	2.53094	0.00225491	0.999564
PRG4	-0.957151	-1.1315	0.00229115	0.999564
PCDHGA6	0.977846	-1.93719	0.00255634	0.999564
RSPH4A	1.03232	-2.16614	0.0025716	0.999564
L1TD1	-1.35773	-0.257932	0.00272162	0.999564
FAM170B-AS1	0.745494	-5.45037	0.00273067	0.999564
KIR2DL5B	-1.00205	-5.36254	0.00284516	0.999564
IGSF1	0.666563	-5.52481	0.00284918	0.999564
LINC01118	1.44145	-3.33411	0.00286118	0.999564
GPHA2	-1.4081	-4.31963	0.00304626	0.999564
NUDT5	0.256407	6.00919	0.00315772	0.999564
KIF5A	0.760081	-0.271861	0.0033039	0.999564
EXOC3L2	1.34873	-2.69493	0.0034204	0.999564
CLLU1	-1.32499	-4.49653	0.0034781	0.999564
MFAP2	1.06691	-4.94372	0.00359748	0.999564
UROC1	1.28198	-4.71404	0.00364479	0.999564
CPNE1	0.450722	7.78941	0.00374567	0.999564
RFX3-AS1	-1.12473	-1.44322	0.00374772	0.999564
MYO1H	1.35771	-4.508	0.00376635	0.999564
SEMA3G	-0.931067	-0.660407	0.00385504	0.999564
USP30	0.231861	3.2488	0.00398004	0.999564
LINC01128	-0.273881	3.89875	0.0040829	0.999564
TNR	1.44751	-2.08819	0.00432963	0.999564
CTHRC1	1.30457	-4.71641	0.00436255	0.999564
HIST1H2AD	-2.07785	-3.88112	0.00456777	0.999564
SMAD1	-0.820135	1.34228	0.00463162	0.999564
NPR3	1.37144	-1.97532	0.0046938	0.999564
SOX5	-0.830905	-1.12915	0.00476714	0.999564
EDN3	-1.30003	-2.57027	0.00496746	0.999564
PRSS1	-1.42485	-4.25103	0.00496924	0.999564
SCGB1C2	-1.82719	-4.29397	0.00502548	0.999564
PAPPA	1.23125	-4.59732	0.00510024	0.999564
NPL	0.429196	6.3849	0.00512648	0.999564
CTXN1	1.49269	-4.00968	0.00521205	0.999564
HOXA5	1.47317	-3.68258	0.00530574	0.999564
GTSF1L	-1.22954	-1.97096	0.00534263	0.999564
THRB-AS1	0.82478	-5.27878	0.00572059	0.999564
ZNF610	0.905245	-0.913228	0.00573003	0.999564
C10orf111	1.18962	-2.98982	0.00579675	0.999564
ODF3	1.59032	-3.40284	0.00579701	0.999564
IL3RA	-0.840073	4.46472	0.0058528	0.999564
LINC00469	1.47279	-3.96983	0.00586302	0.999564
MCF2	-0.693798	-0.245853	0.00613283	0.999564
PPL	0.75701	0.0193025	0.00620065	0.999564
LINC01516	-1.03055	-5.01797	0.00636181	0.999564
ARSG	0.216815	4.47044	0.00638585	0.999564
LINC00664	1.62669	-2.3837	0.00642162	0.999564
TIMP3	1.19617	-2.62534	0.00654009	0.999564
LINC00618	-1.28245	-3.56592	0.00663302	0.999564
FAM45A	0.287994	5.65533	0.00665596	0.999564
NPY1R	0.526812	-5.53116	0.00665656	0.999564
TMEM89	-0.990627	-5.10302	0.00682189	0.999564
CORT	1.41676	-2.74496	0.00694215	0.999564
ERVMER34-1	0.564026	-5.49181	0.00702212	0.999564
GPR21	0.85162	-5.32125	0.0070309	0.999564
KBTBD12	1.50797	-3.80555	0.00704606	0.999564
HIST1H4D	1.23291	-3.37706	0.00722802	0.999564
ADCY6	0.810281	-0.956368	0.00725888	0.999564
LRRC16A	-0.476872	2.09062	0.00749973	0.999564
TEKT2	1.13348	-2.66119	0.00761295	0.999564
NBAT1	0.917642	-5.18314	0.00765999	0.999564
RNF217-AS1	0.885586	-5.2665	0.00766832	0.999564
C20orf202	1.34901	-3.42403	0.00768375	0.999564
ORAI2	0.337376	7.03117	0.00768489	0.999564
LRRTM4	0.402751	-5.58489	0.00769077	0.999564
HOXB6	-1.48325	-3.77155	0.00808399	0.999564
CLEC9A	0.860123	1.17171	0.008132	0.999564
C2orf66	1.33207	-3.82157	0.00854407	0.999564
EPOR	0.359346	4.27428	0.00898145	0.999564
UGT2A2	0.54831	-5.55168	0.00910476	0.999564
SLC2A1-AS1	-0.907472	-1.01636	0.00914993	0.999564
LCMT1-AS2	1.29194	-4.21113	0.00918569	0.999564
ABCG1	0.323761	5.29553	0.00931858	0.999564
ZNF626	0.473581	2.63474	0.00955369	0.999564
CHRNB1	-0.24657	3.15116	0.00980761	0.999564
CPS1	-1.21665	-2.92354	0.00990535	0.999564
KIR3DX1	-0.959064	1.26776	0.00992672	0.999564

## Sheet: Table S4
Supplemental Table 4: Differentially expressed genes in whole blood, South Africa
RSTR vs. LTBI
	log2 fold-change (RSTR/LTBI)	AveExpr	P.Value	adj.P.Val
C5orf60	1.03843	-5.0068	3e-05	0.59002
DACT3	1.47612	-3.5392	8e-05	0.66405
SFXN2	0.36966	2.64759	0.00023	0.66405
MT3	1.68792	-3.72282	0.00028	0.66405
NSMF	0.42284	5.79047	0.00033	0.66405
INPP5J	1.21082	-2.62082	0.00036	0.66405
LPIN3	1.48298	-2.35947	0.00047	0.66405
STMN4	1.1622	-4.67693	0.00058	0.66405
ITIH4	0.51219	2.80628	0.00066	0.66405
RECQL5	0.28483	4.55134	0.00079	0.66405
TSPEAR-AS2	1.25248	-2.6224	0.00086	0.66405
MKLN1-AS	-0.56684	0.05577	0.00086	0.66405
DNAJB6	-0.20276	6.80467	0.00094	0.66405
TMEM63C	0.64967	1.79629	0.00094	0.66405
KIRREL2	1.36654	-3.83012	0.001	0.66405
ZFP1	-0.36332	3.10369	0.00103	0.66405
MYT1	-1.34697	-3.40886	0.00105	0.66405
PMM2	0.32102	4.38687	0.00108	0.66405
MYLK4	-0.81505	0.12923	0.00118	0.66405
RBMXL1	-0.21599	4.35634	0.00143	0.66405
HOXA9	-0.86038	-1.0914	0.00151	0.66405
FAM177B	-1.05449	-0.57221	0.00158	0.66405
APPL2	-0.24045	5.03079	0.00161	0.66405
DNAJC30	0.29113	3.05669	0.00169	0.66405
NME4	0.42276	4.81453	0.00175	0.66405
ADM2	0.57431	0.70737	0.00177	0.66405
OR52N4	0.72207	-1.12611	0.00177	0.66405
DDX3X	-0.37064	8.51953	0.00181	0.66405
FUOM	0.46917	2.1295	0.00191	0.66405
PIK3IP1-AS1	0.88012	-1.57946	0.00199	0.66405
TUT1	0.25916	4.65535	0.00202	0.66405
NCOA4	-0.48572	9.5678	0.0021	0.66405
CDK18	0.54553	1.37356	0.00214	0.66405
HSD11B2	-1.04989	-4.71799	0.00217	0.66405
RPS6KA5	-0.34665	4.89809	0.00218	0.66405
AIF1L	1.36071	-2.7654	0.00219	0.66405
ZC3H11A	-0.29531	7.68742	0.00221	0.66405
ASIC3	0.4821	0.76289	0.00229	0.66405
PRL	1.74613	-3.85502	0.00233	0.66405
MCU	-0.25944	4.32953	0.00236	0.66405
NT5C3B	0.56633	3.12086	0.00243	0.66405
CORO6	0.67539	0.84261	0.0025	0.66405
PLEKHG6	-1.03164	-2.10955	0.00252	0.66405
C3orf49	-0.86766	-4.78119	0.00259	0.66405
ISOC1	-0.22701	3.71101	0.0026	0.66405
CPT1C	1.30453	-2.31517	0.00263	0.66405
LENG9	0.39112	2.13212	0.00266	0.66405
CTNND2	-1.12396	-4.29658	0.00274	0.66405
AIRN	-1.20905	-4.10753	0.00284	0.66405
SMPD1	0.24859	5.23932	0.00284	0.66405
CACNA1C-AS2	0.49591	0.57134	0.00286	0.66405
HID1	0.48966	1.69128	0.00289	0.66405
TERF2IP	-0.2202	6.77465	0.00294	0.66405
RASA4B	0.59483	4.50264	0.00296	0.66405
PTGS2	-0.4624	4.67589	0.003	0.66405
NUDT5	-0.1961	5.98543	0.003	0.66405
SYNPO2L	-0.964	-4.59045	0.00302	0.66405
DNTT	-1.06399	-2.75746	0.00307	0.66405
CREBRF	-0.33372	6.72621	0.00307	0.66405
FGFBP1	0.97642	-4.61516	0.0031	0.66405
NPTN	-0.27129	6.3327	0.00315	0.66405
PICK1	0.24025	3.88664	0.00319	0.66405
CEP97	-0.3708	3.30858	0.00331	0.66405
TP53INP1	-0.34677	6.89475	0.00342	0.66405
ZCCHC6	-0.42425	6.61906	0.00343	0.66405
H1FX	0.4339	6.85771	0.00344	0.66405
ADAMTS13	0.53678	0.26646	0.00345	0.66405
KAT2B	-0.31427	6.21277	0.00348	0.66405
ITGAD	1.17799	0.58117	0.00353	0.66405
PRAP1	-1.60203	-3.27691	0.00355	0.66405
SLC22A18	0.34697	4.54854	0.00357	0.66405
GLIPR1	-0.30007	7.94481	0.00359	0.66405
ADAMTS2	1.36081	-3.95101	0.00361	0.66405
PAPOLA	-0.2518	7.6304	0.00374	0.66405
TPRN	0.32045	3.5104	0.00391	0.66405
STXBP5	-0.37031	5.42907	0.00392	0.66405
STAG2	-0.34222	7.31548	0.00397	0.66405
LINC01431	1.1104	-2.30103	0.00399	0.66405
MTHFSD	0.22707	4.17125	0.00401	0.66405
LYSMD4	0.30152	3.20236	0.00404	0.66405
ZNF707	0.23183	3.91454	0.00408	0.66405
TBX6	0.58778	-0.02738	0.00412	0.66405
PGPEP1L	-1.10095	-4.40044	0.00413	0.66405
TRIP6	0.34614	2.78743	0.00414	0.66405
PARP8	-0.26683	7.48644	0.00414	0.66405
MBLAC1	0.39313	0.13362	0.00414	0.66405
EMILIN1	0.50303	0.27016	0.00422	0.66405
DNAJC5B	-1.24578	-2.48169	0.00435	0.66405
COPB1	-0.23777	6.92048	0.0044	0.66405
ATP6V1G2-DDX39B	1.12253	-4.91489	0.00455	0.66405
TMIGD2	0.47042	3.20677	0.00462	0.66405
OR2A7	-1.40274	-2.65621	0.00475	0.66405
SCRN2	0.31722	4.36005	0.00488	0.66405
RCCD1	0.2623	2.05802	0.00489	0.66405
AFAP1L1	1.10428	-3.72694	0.00492	0.66405
JMJD8	0.30629	5.06674	0.00493	0.66405
AOC2	-0.54665	3.34207	0.00509	0.66405
BTD	-0.22702	3.70414	0.00511	0.66405
HEMK1	0.25737	5.17317	0.00519	0.66405
PTDSS2	0.25284	3.87455	0.00526	0.66405
CFC1	0.76373	-4.66849	0.00528	0.66405
ROBO3	0.55324	2.10049	0.00532	0.66405
B3GALNT1	-0.72777	-0.99228	0.00539	0.66405
ZNF629	0.38099	2.67835	0.00539	0.66405
ZNF512B	0.30203	4.13932	0.00551	0.66405
GRASP	0.40067	2.49458	0.00552	0.66405
KCNS1	-1.11602	-0.83632	0.00552	0.66405
NOTCH4	0.39232	1.92173	0.00565	0.66405
BAIAP2L2	0.67504	-0.37117	0.00573	0.66405
FAM46B	0.90799	-2.5327	0.0058	0.66405
NGFR	0.70012	-0.58743	0.00582	0.66405
CALCB	-1.04056	-3.63905	0.00587	0.66405
LINC00950	0.73516	-0.94722	0.00596	0.66405
F2RL1	-0.47176	4.61627	0.00597	0.66405
KATNBL1	-0.37356	5.10074	0.00606	0.66405
RC3H1	-0.30077	6.30632	0.00609	0.66405
SF3B1	-0.27277	9.01704	0.00614	0.66405
CRYZ	-0.40227	3.58483	0.0062	0.66405
PRSS27	0.55736	-1.15784	0.00621	0.66405
SPPL2B	0.29638	5.71468	0.00627	0.66405
ABCB9	0.47279	1.5033	0.00627	0.66405
RMND5A	-0.23673	6.42546	0.00629	0.66405
AHCTF1	-0.34557	6.33808	0.0063	0.66405
MARCH6	-0.16739	6.90017	0.00634	0.66405
RTEL1	0.30126	3.87411	0.00634	0.66405
UST	-0.29869	2.9531	0.00641	0.66405
NDUFV1	0.25847	6.4342	0.00647	0.66405
FAM50A	0.34049	5.38725	0.00649	0.66405
SLC38A2	-0.26566	6.80304	0.00654	0.66405
RASA4	0.39136	6.35506	0.00656	0.66405
PUM2	-0.21047	7.37448	0.00657	0.66405
CPLX3	1.23691	-2.70152	0.00665	0.66405
ZFC3H1	-0.28123	6.07055	0.00667	0.66405
ZNF143	-0.18031	4.86865	0.00673	0.66405
SPRN	0.31365	2.26905	0.00676	0.66405
OSBPL8	-0.37801	6.97357	0.00679	0.66405
GRAPL	0.72887	1.26011	0.00681	0.66405
ZBTB44	-0.2646	6.2602	0.00683	0.66405
FAM214A	-0.24332	5.53221	0.00685	0.66405
HNRNPLL	-0.24253	4.59163	0.00685	0.66405
INTS8	-0.21347	5.53505	0.00687	0.66405
TMEM240	0.93603	-1.31057	0.00693	0.66405
FGFR3	-1.0218	-3.65175	0.00693	0.66405
TMEM56	-0.91058	-0.06655	0.00701	0.66405
AEBP1	0.55204	2.49595	0.00707	0.66405
KIAA1551	-0.42543	8.56256	0.00711	0.66405
EIF4G2	-0.22849	9.33684	0.00716	0.66405
STOML1	0.27584	3.12652	0.00719	0.66405
TNKS	-0.24223	5.16867	0.00725	0.66405
RAD21	-0.29451	7.55712	0.00728	0.66405
UGCG	-0.24138	4.85397	0.00731	0.66405
ITGB2-AS1	0.35939	6.68449	0.00732	0.66405
ACADS	0.28628	4.09684	0.00738	0.66405
CREB1	-0.25801	6.26727	0.00743	0.66405
OR2A4	1.06918	-4.5767	0.00746	0.66405
RSPH4A	0.81211	-1.83291	0.00754	0.66405
CCNDBP1	-0.27595	7.45237	0.00755	0.66405
SULT2B1	0.88159	-2.64085	0.00766	0.66405
GPD1	0.60881	-1.28422	0.00776	0.66405
PRDM1	-0.25677	5.89691	0.00788	0.66405
P4HA1	-0.24628	4.69962	0.00797	0.66405
ZNF816-ZNF321P	-0.38673	0.75826	0.00807	0.66405
PPDPF	0.41113	7.28684	0.0081	0.66405
FLJ42969	-0.7013	-5.02522	0.00816	0.66405
INTS6	-0.21273	5.45664	0.00821	0.66405
MCC	-0.47548	2.43624	0.00825	0.66405
ADAM10	-0.25861	7.13086	0.00827	0.66405
HIST1H1T	-1.09352	-3.35677	0.00829	0.66405
AARSD1	0.25374	3.79286	0.00832	0.66405
SCAMP5	0.53582	2.09589	0.00836	0.66405
PPP1R21	-0.17245	5.42218	0.00839	0.66405
NEURL1	0.45202	3.83966	0.00844	0.66405
TM2D3	-0.19986	5.45895	0.00852	0.66405
WDR73	0.13523	5.44427	0.00856	0.66405
ZNF589	0.23377	5.27803	0.00858	0.66405
ACTR3	-0.27171	8.60623	0.00864	0.66405
PSD	0.38612	2.25986	0.00866	0.66405
CIRBP	0.269	8.52998	0.00867	0.66405
TRIM67	1.08229	-3.65687	0.00867	0.66405
PRR15L	-0.98635	-3.88149	0.00867	0.66405
TOPORS	-0.36967	5.17063	0.00869	0.66405
PCDH8	-1.68558	-2.71563	0.00871	0.66405
RAB14	-0.19354	6.815	0.00872	0.66405
YOD1	-0.35456	4.60132	0.00873	0.66405
NAPEPLD	-0.21315	3.43818	0.00877	0.66405
SNAP25	-1.02911	-3.84624	0.00877	0.66405
CBLL1	-0.17927	5.57273	0.00881	0.66405
CCDC74B	0.90142	-3.13985	0.00883	0.66405
TRMU	0.25957	4.97734	0.00887	0.66405
IDNK	0.2571	2.45076	0.00888	0.66405
LYST	-0.32294	7.81936	0.00891	0.66405
SNHG11	0.29143	2.69031	0.00895	0.66405
ACP2	0.2734	4.3196	0.00898	0.66405
KLK2	-0.77679	-4.87886	0.0091	0.66405
DYRK1A	-0.18397	6.5443	0.00912	0.66405
SULT1A3	0.65701	3.9147	0.00915	0.66405
RAG2	0.74463	-5.02046	0.00915	0.66405
MARCH7	-0.25439	7.25402	0.00918	0.66405
HVCN1	-0.23478	6.38946	0.00918	0.66405
ZNF517	0.29562	3.43441	0.0092	0.66405
PTPN3	-0.99199	-2.83829	0.00923	0.66405
ZNF215	-0.96163	-2.25488	0.00924	0.66405
CCNO	0.71042	-5.0068	0.00925	0.66405
KRT5	1.07269	-0.55013	0.00926	0.66405
IFNGR1	-0.31815	7.78453	0.00927	0.66405
FIGLA	0.83414	-4.95811	0.00927	0.66405
SLC14A1	-0.45253	4.06188	0.00928	0.66405
NPIPB8	-1.19335	-3.4804	0.00928	0.66405
NR3C1	-0.22934	6.80825	0.00928	0.66405
CPSF3L	0.20204	6.61453	0.00929	0.66405
CDC37	0.23948	7.27773	0.00929	0.66405
PHLPP1	-0.35539	3.50357	0.00942	0.66405
IDH1	-0.25407	5.18345	0.00944	0.66405
MIR181A2HG	-1.01797	-3.2449	0.00948	0.66405
GOLGA7	-0.17642	6.32763	0.00949	0.66405
C19orf45	1.1972	-3.73213	0.0095	0.66405
CDK14	-0.3283	3.87062	0.00951	0.66405
CADM3	-0.90281	-4.65879	0.00951	0.66405
WAC	-0.21692	7.52802	0.00955	0.66405
GRAP	0.32628	5.7419	0.0096	0.66405
MYBBP1A	0.2477	5.16339	0.00962	0.66405
ACTA2-AS1	-0.79511	-1.35318	0.00984	0.66405
OCM	0.60276	-0.46135	0.00987	0.66405
PRDM10	-0.28198	3.8212	0.00989	0.66405
CUL4B	-0.22229	6.40112	0.00997	0.66405

## Sheet: Table S7
Supplemental Table 7: Differentially expressed genes in monocytes, Uganda
RSTR vs. LTBI
	log2 fold-change (RSTR/LTBI)	AveExpr	P.Value	adj.P.Val
RP11-710C12.1	-1.18353	-3.94297	3.69496e-05	0.391843
BDKRB2	-0.656813	-4.04343	4.00327e-05	0.391843
RN7SL77P	-0.72204	-4.03943	4.62122e-05	0.391843
RP11-617F23.1	0.316081	3.29306	9.71862e-05	0.391843
IGLV3-12	-0.670492	-3.92222	9.89177e-05	0.391843
RP11-758M2.1	-0.924798	-3.84025	0.00010575	0.391843
PCSK1N	-0.944417	-3.59108	0.000120353	0.391843
RP11-739B23.1	-0.7713	-3.91793	0.00012221	0.391843
AC023491.2	-0.543231	-4.09733	0.000126677	0.391843
MAP2	-1.21596	-2.41672	0.000142116	0.391843
PRSS50	-0.420402	-4.13058	0.000157404	0.391843
RP11-154D17.1	-0.468551	-4.19154	0.000171319	0.391843
CGB7	-0.824517	-3.7987	0.000174449	0.391843
RP11-131L12.2	-0.577592	-4.06624	0.000174671	0.391843
SBF1	-0.150647	6.23705	0.000186249	0.391843
POM121L7	-0.439533	-4.14146	0.000201378	0.391843
NEO1	-1.28909	-0.345794	0.000218207	0.391843
RP11-848P1.4	0.761597	-0.541588	0.000221899	0.391843
RP13-631K18.2	-0.383938	-4.14145	0.000234407	0.391843
RP11-343H5.6	-0.412541	-4.22273	0.000241015	0.391843
HHATL-AS1	-0.544349	-4.1509	0.000244674	0.391843
CHRM2	-0.811532	-3.95304	0.000245364	0.391843
FLRT3	-0.634277	-4.06084	0.000257978	0.391843
RP11-426L16.10	-0.704384	-4.0088	0.000260599	0.391843
LINC01187	-0.910625	-3.88943	0.000274073	0.391843
ZEB2-AS1	0.299458	3.47086	0.000282183	0.391843
RP11-261P9.4	-0.932101	-3.35172	0.000296814	0.396896
TSHZ2	-1.52847	-0.177353	0.000318662	0.39854
RNU6ATAC7P	-0.646119	-3.90179	0.000320121	0.39854
CACNA2D1	-0.481502	-4.15074	0.000346824	0.417391
RP11-35G22.1	-0.700305	-3.71229	0.000372664	0.427865
RP11-274B18.4	-0.464714	-4.18782	0.000406096	0.427865
SNAP25-AS1	-0.41771	-4.13056	0.000406203	0.427865
RNU6-1304P	-0.554034	-4.19618	0.000408872	0.427865
SNORD116-26	-1.0407	-2.40559	0.000426578	0.427865
RP11-554F20.1	-0.549234	-4.09601	0.000428102	0.427865
RP11-252E2.1	-0.919942	-3.8078	0.000438484	0.427865
AC007040.11	-0.4988	-3.95654	0.000501075	0.46261
DNM1	0.992296	0.503936	0.000506772	0.46261
RP11-384C4.7	-0.379449	-4.20706	0.000525042	0.46261
RP11-18H21.3	-0.489723	-4.20241	0.000528787	0.46261
KLF7-IT1	0.944831	-1.4658	0.000538158	0.46261
SRD5A2	-0.547406	-3.96121	0.000565379	0.463675
OR51I1	-0.546748	-4.17106	0.000574797	0.463675
GJC3	-0.566338	-4.03067	0.000598316	0.463675
RN7SKP119	-0.542684	-4.03488	0.000608196	0.463675
RP11-309N24.1	-0.386495	-4.22273	0.000614829	0.463675
RP11-86K22.2	-0.532314	-4.07662	0.000635678	0.463675
RNU6-282P	-0.785191	-3.86554	0.000640127	0.463675
LINC00298	-0.399392	-4.14752	0.000665004	0.463675
LINC00271	-0.763513	-3.63599	0.00067153	0.463675
RP13-1032I1.11	-0.442183	-4.19066	0.000672755	0.463675
RP11-43D2.2	-0.367828	-4.18674	0.000680666	0.463675
GRIA2	-0.576633	-4.09278	0.000700462	0.468324
RNU6-402P	-0.366561	-4.2213	0.00073098	0.474213
RP11-289F5.1	-0.443517	-4.19064	0.00073554	0.474213
BMS1P14	-0.472034	-4.10081	0.000753921	0.477536
MIR646HG	0.951651	-2.63319	0.000823959	0.500304
CTA-315H11.2	-0.401887	-4.18209	0.000829014	0.500304
PPP5D1	0.399571	1.02721	0.000849232	0.500304
CTD-2363C16.2	-0.532619	-4.01724	0.000859037	0.500304
CTD-2240J17.2	-0.707073	-3.84721	0.000859152	0.500304
OR52D1	-0.564199	-4.05488	0.00088719	0.504702
DNAAF3	-0.596685	-4.09865	0.000936233	0.504702
RN7SL520P	-0.52992	-3.92296	0.000938181	0.504702
SPSB1	-0.760946	1.83724	0.000949134	0.504702
RP5-872K7.7	-0.428132	-4.18209	0.000963368	0.504702
XXbac-BPG116M5.17	2.0763	-0.678412	0.000963708	0.504702
LINC00614	-0.367171	-4.2213	0.000971043	0.504702
FOXG1	-0.484558	-4.15497	0.000978537	0.504702
GAL3ST3	0.561791	-4.08049	0.000992924	0.504909
SLC4A4	-1.25224	-1.58414	0.00104265	0.520371
CTA-414D7.1	0.373581	2.41843	0.00105216	0.520371
GRB7	-0.311167	-4.2213	0.00109498	0.52171
OR2L8	-0.59923	-3.90941	0.00111303	0.52171
GNAI3	0.135646	7.61326	0.00111511	0.52171
SAXO1	-0.556761	-3.92865	0.00111832	0.52171
CTD-2314G24.2	-0.592072	-4.06733	0.00113735	0.52171
TCL1B	-0.738698	-3.51986	0.00115605	0.52171
UTS2R	-0.550128	-4.00421	0.00116551	0.52171
IGLV1-50	-0.596131	-3.89694	0.00117047	0.52171
PCDHB8	-0.321361	-4.18674	0.00121612	0.531155
RGMB-AS1	-0.328526	-4.20241	0.00122108	0.531155
IFNA17	-0.525243	-4.18528	0.00126647	0.544339
RN7SKP174	-0.365513	-4.22684	0.00128846	0.546327
CTC-441N14.2	-0.393979	-4.2525	0.00130157	0.546327
RP11-87E22.2	-0.563168	-4.10223	0.00131649	0.546327
AC009133.23	-0.982921	-3.67448	0.0013404	0.54993
RP11-420N3.3	-0.382059	-4.21186	0.00139119	0.559848
AZIN2	-0.891667	-1.14803	0.00139725	0.559848
KRT73-AS1	-0.826538	-3.51536	0.00142854	0.559848
RP4-598P13.1	-0.462091	-4.08514	0.00145627	0.559848
RNU1-16P	0.687472	-3.62321	0.00146204	0.559848
AP000350.5	-2.20228	0.38547	0.00148022	0.559848
PAUPAR	-0.363788	-4.24627	0.00150461	0.559848
CRAMP1	-0.122467	4.87453	0.00152073	0.559848
LINC00550	-0.333771	-4.20814	0.00153963	0.559848
LINC01376	-0.502077	-3.85981	0.00154025	0.559848
HS3ST3A1	-1.34049	-0.459519	0.00154302	0.559848
MAPK14	0.158817	5.8904	0.00156018	0.559848
RP11-976B16.1	-0.372243	-4.132	0.00156616	0.559848
PRKACG	-0.37879	-4.2165	0.00159457	0.560979
MS4A2	0.858694	0.579736	0.0016004	0.560979
PRKCZ	-0.795471	0.540218	0.00173493	0.569486
HPGD	-0.960007	-1.49033	0.00175049	0.569486
KRT74	-0.392064	-4.20241	0.0017608	0.569486
RP11-94M14.2	-0.306035	-4.22273	0.00176356	0.569486
LYPD1	-0.62643	-3.84705	0.00178314	0.569486
C5orf63	-0.730264	0.388449	0.00179564	0.569486
RNY3P2	-0.53547	-4.08926	0.00181107	0.569486
RP11-465N4.4	0.91017	-1.84431	0.00182837	0.569486
CTB-60B18.18	-0.298746	-4.20563	0.00186633	0.569486
RP11-806L2.6	0.95302	-1.53982	0.00187674	0.569486
FAM153A	-0.910179	-3.07292	0.00187736	0.569486
RN7SL791P	-0.382235	-4.2213	0.00188083	0.569486
FGD4	0.455624	5.68606	0.00188568	0.569486
NMNAT1	0.259838	3.70955	0.00191056	0.569486
SNORA76	-0.417237	-4.1118	0.00195149	0.569486
HCN4	-0.374892	-4.20706	0.00195791	0.569486
LINC00161	-0.296882	-4.22273	0.00198826	0.569486
RP11-30P6.6	-0.396924	-4.23682	0.00199136	0.569486
RP11-161H23.9	-0.345763	-4.19618	0.00199832	0.569486
HK3	0.35835	5.9296	0.00199956	0.569486
MTUS2-AS1	-0.382097	-4.11168	0.00200885	0.569486
CCNF	0.251964	2.16016	0.00201687	0.569486
RP3-337H4.9	0.850417	-3.33108	0.00202065	0.569486
RNU1-100P	-0.523968	-4.08191	0.00202909	0.569486
RP11-544P1.3	-0.385577	-4.23218	0.00204507	0.569486
RAB19	-0.805853	-3.45415	0.00205263	0.569486
HAPLN3	-1.32688	0.262849	0.00205786	0.569486
RP1-137D17.1	-0.355254	-4.19618	0.00207111	0.569486
DDX39B-AS1	-0.595304	-3.70471	0.0020914	0.569486
RP11-1167A19.2	-0.522738	-3.99704	0.00210526	0.569486
RP11-598F7.5	-0.375156	-4.2525	0.00211365	0.569486
LINC00240	-0.529446	-4.02417	0.00214861	0.573952
RP11-66A2.2	-0.441925	-4.21213	0.0021624	0.573952
RP11-307L14.2	0.457653	-4.02897	0.00220253	0.573952
LRIG3	-0.512413	-4.11633	0.00224613	0.573952
TCAP	-0.667479	-0.963689	0.0022515	0.573952
PLCB2-AS1	-0.675073	-3.59628	0.00225479	0.573952
RNU2-25P	0.603876	-3.78963	0.00225569	0.573952
SATB2	0.414692	1.74635	0.00227023	0.573952
SYT13	-0.320491	-4.19761	0.0022733	0.573952
GPR142	-0.277282	-4.26194	0.00228995	0.574141
CTB-37A13.1	0.77185	-3.31216	0.00230624	0.574239
LINC01565	-0.401987	-4.132	0.00239155	0.591402
NOL12	0.177594	3.91798	0.00240962	0.591816
RP11-973H7.1	-0.998704	-2.3363	0.00245807	0.594892
AP000302.58	-0.564786	-3.7967	0.00252148	0.594892
CFC1	-0.336866	-4.239	0.00252233	0.594892
TAF8	-0.15038	4.57275	0.00253362	0.594892
MED19	0.181563	3.904	0.0025402	0.594892
OR4D11	-0.307321	-4.26194	0.00256238	0.594892
RP11-6D1.3	-0.539544	-3.88178	0.00259815	0.594892
CTD-2351A16.1	-0.404453	-4.16484	0.00260512	0.594892
SSTR3	-1.14388	-2.22237	0.00263295	0.594892
CTD-2358C21.5	-0.352963	-4.23682	0.00264704	0.594892
KLRC1	-1.40831	-1.09889	0.0026679	0.594892
ITPR3	-0.620323	3.43695	0.00269747	0.594892
RP11-116O18.3	-0.337386	-4.24305	0.00269996	0.594892
RNU6-695P	-0.280728	-4.26194	0.00271376	0.594892
OR6C4	-0.423616	-4.24147	0.00275264	0.594892
VWA3B	-0.525804	-4.05394	0.00277101	0.594892
PGA4	1.21936	-0.223197	0.00282205	0.594892
RP11-553L6.2	-1.04222	-1.46008	0.00283105	0.594892
DGUOK	0.162025	3.27708	0.0028392	0.594892
CAPN6	-0.350579	-4.22738	0.00284323	0.594892
AQP3	-0.871606	0.121662	0.00285579	0.594892
RAB43	-0.542075	2.85903	0.00285988	0.594892
SH2D1B	-1.1706	1.1149	0.00286361	0.594892
ZBED8	0.37768	1.42524	0.0028707	0.594892
SNHG18	-0.64925	-3.93275	0.0028827	0.594892
AC069277.2	-0.277759	-4.19296	0.00291684	0.594892
UNC45B	-0.749531	-3.57812	0.00293108	0.594892
SIRPG	-1.1177	-2.02207	0.00293696	0.594892
CTD-3253I12.1	-0.326154	-4.2525	0.00293803	0.594892
NUDT6	0.42345	1.40987	0.0029743	0.594892
RP11-325K4.2	0.792643	-1.36506	0.00299623	0.594892
PSRC1	0.612994	0.560022	0.00299992	0.594892
RP11-269F20.1	-0.445812	-4.08656	0.00301129	0.594892
AC003958.2	-0.363851	-4.21382	0.00303529	0.594892
TLL2	-0.615574	-3.70141	0.00304138	0.594892
RP11-79P5.9	-0.787951	-2.51762	0.0030463	0.594892
LINC00431	-0.332375	-4.23802	0.00305612	0.594892
CNTD2	-0.415378	-4.13042	0.00307999	0.594892
RP4-550H1.7	-0.30466	-4.24162	0.00308455	0.594892
ZNF728	-0.25895	-4.24305	0.0031335	0.594892
RP11-498P14.5	-0.630229	-3.70485	0.00321076	0.594892
NPHS1	-0.332592	-4.20563	0.0032262	0.594892
LCK	-1.00186	2.19291	0.00325408	0.594892
LINC01011	0.326294	1.90659	0.00326168	0.594892
SGIP1	0.966906	-2.72456	0.00326232	0.594892
TRIM51	-0.376886	-4.20814	0.0032775	0.594892
AC124944.3	-0.418723	-4.20241	0.00329653	0.594892
BMP5	-0.36456	-4.21388	0.00330706	0.594892
CCDC152	-0.951671	-0.650845	0.00331069	0.594892
RP11-95I16.2	-0.406723	-4.1509	0.00332045	0.594892
OR52R1	-0.396116	-4.21186	0.00332307	0.594892
OTOP2	-0.512224	-4.11726	0.00334711	0.594892
LA16c-329F2.2	-0.748429	-1.85131	0.00336439	0.594892
DAGLB	0.194477	5.23022	0.00337964	0.594892
TERF2IP	-0.106587	5.9641	0.00340054	0.594892
PKDCC	-0.544467	-3.82442	0.00342958	0.594892
RP5-1063M23.2	-0.288255	-4.2525	0.00344899	0.594892
IFNA13	-0.550013	-4.02685	0.00347058	0.594892
AP001619.2	-0.462618	-4.04269	0.00352497	0.594892
RP1-47M23.3	-1.10471	-0.868879	0.00355935	0.594892
RN7SL756P	-0.265195	-4.24305	0.00356977	0.594892
RP11-108M9.4	0.732915	-0.726004	0.00357726	0.594892
RP11-209D14.4	0.769291	-1.48875	0.00358505	0.594892
SEZ6L	0.990276	-2.06297	0.00359455	0.594892
SMIM11A	0.678489	0.219676	0.00359675	0.594892
APOD	-0.420817	-4.00528	0.0036104	0.594892
PTRH2	0.13634	4.22336	0.0036372	0.594892
RP11-493L12.4	-0.310092	-4.1509	0.00363814	0.594892
OR5AN1	-0.436844	-4.19618	0.0036383	0.594892
RNY4P7	-0.36692	-4.2525	0.00365023	0.594892
RP11-58K22.5	-0.590059	-3.74331	0.00368463	0.594892
MRPS10	0.119169	4.84769	0.00368517	0.594892
PI16	-0.669134	-3.55778	0.00368624	0.594892
RP11-168K11.2	-0.238421	-4.26194	0.00368976	0.594892
THEMIS	-1.1641	1.03796	0.00370235	0.594892
SLC25A44	0.107352	5.33485	0.00376669	0.594892
METTL7B	0.916461	0.331825	0.00378807	0.594892
AMELX	-0.328172	-4.26194	0.00379685	0.594892
FAM45A	0.177458	4.81783	0.00380121	0.594892
RP1-85F18.6	0.419526	-3.97889	0.0038092	0.594892
KRT24	-0.343486	-4.2525	0.00381105	0.594892
RP1-153P14.5	-0.492812	-3.89374	0.00382229	0.594892
RP11-307E17.8	0.52659	0.547719	0.00385642	0.594892
C20orf194	0.178628	5.58278	0.0038854	0.594892
CFDP1	0.131297	6.3836	0.00389341	0.594892
RP11-102F4.2	-0.420679	-4.15232	0.00389536	0.594892
AC011247.3	-0.390419	-4.06961	0.00390365	0.594892
FCMR	-0.725997	3.9024	0.00390601	0.594892
CTD-2631K10.1	-0.387736	-4.06017	0.00390945	0.594892
RN7SL156P	-0.363296	-4.17122	0.00392445	0.594892
RN7SL456P	-0.42846	-4.08049	0.00393294	0.594892
PDE1B	0.391539	3.01965	0.00395196	0.594892
PAPSS1	0.210385	6.69948	0.00395452	0.594892
PTGDS	-0.860822	-3.11183	0.00397599	0.595639
REEP5	0.183759	7.45455	0.00409687	0.598234
TP53I13	-0.156714	3.63664	0.00409742	0.598234
APBA3	-0.190599	3.4295	0.00412853	0.598234
MUC7	-0.343832	-4.15074	0.00413646	0.598234
EMILIN2	0.190858	9.27859	0.00422475	0.598234
IGKV2D-26	-0.279793	-4.2336	0.00422958	0.598234
BIK	0.888832	-2.116	0.00424186	0.598234
MAGEA9B	-0.368223	-4.15697	0.00424236	0.598234
ANKRD18B	-0.681538	-3.93654	0.00426739	0.598234
LRRIQ1	-0.424539	-4.1509	0.00427346	0.598234
ADAD2	-0.409878	-4.17729	0.0042776	0.598234
SLC30A8	-0.41445	-4.18782	0.00427887	0.598234
SUSD1	0.350571	5.92609	0.00431034	0.598234
HNMT	0.29016	6.9771	0.00435231	0.598234
HOOK1	-0.940855	-0.567391	0.00444876	0.598234
RP11-136K14.2	-0.426038	-4.14145	0.00445003	0.598234
RNA5SP498	0.361299	-4.14002	0.00445074	0.598234
TMEM255B	0.321831	2.32389	0.00445461	0.598234
OR5B12	-0.311768	-4.20706	0.00454244	0.598234
CTD-2623N2.11	-0.656761	-3.63708	0.00455506	0.598234
ALG6	0.202171	2.31314	0.00456867	0.598234
RASGRF2	-1.036	0.0471097	0.00457643	0.598234
RNA5SP308	-0.314882	-4.28226	0.0045927	0.598234
RN7SKP139	-0.47346	-4.09996	0.00460597	0.598234
RNF214	0.105797	5.115	0.00462857	0.598234
RP11-326C3.15	-0.353314	-4.2525	0.00466291	0.598234
CTB-35F21.2	-0.280388	-4.20098	0.00469727	0.598234
RP11-973H7.4	-0.459893	-3.88213	0.00475759	0.598234
FER	0.172405	5.15576	0.00477692	0.598234
FAM83B	-0.297003	-4.22273	0.00480671	0.598234
RNA5SP48	-0.735582	-2.30946	0.00486811	0.598234
RP11-442N1.2	-0.429962	-4.14281	0.00488025	0.598234
RP11-145P16.2	-0.288451	-4.26194	0.00488622	0.598234
RP11-778J15.1	-0.274915	-4.27282	0.00493114	0.598234
RP11-394O4.5	-0.427687	-4.03131	0.00495006	0.598234
KIR2DL5A	-0.327133	-4.14552	0.00495053	0.598234
USH1G	-0.512291	-4.13913	0.00495716	0.598234
RGS16	-0.828401	-0.735362	0.00498702	0.598234
C9orf41-AS1	-0.413785	-4.08049	0.00498746	0.598234

## Sheet: Table S8
Supplemental Table 8: Differentially expressed genes in monocytes, South Africa
RSTR vs. LTBI
	log2 fold-change (RSTR/LTBI)	AveExpr	P.Value	adj.P.Val
LINC01484	-1.49221	-3.46005	4.73736e-05	0.853146
SPRY2	0.83289	1.46929	0.000121101	0.853146
SLC38A4	-1.15922	-4.01501	0.000129115	0.853146
FAT1	-1.28175	-3.71107	0.000154913	0.853146
IFT27	0.289341	3.56964	0.000214647	0.920303
VMA21	0.25849	4.76026	0.000281035	0.920303
PRR15	-1.39872	-3.17899	0.000469803	0.920303
EFCC1	-1.26739	-3.33237	0.000555433	0.920303
CDH6	-1.01233	-4.10491	0.000564699	0.920303
LMBRD2	0.190451	5.11589	0.000716062	0.920303
SYNDIG1L	-0.995365	-4.23209	0.00072943	0.920303
SLC25A30-AS1	-1.15893	-3.28021	0.000825055	0.920303
L3MBTL3	-0.310037	4.71757	0.000976167	0.920303
MKL2	0.317984	4.78306	0.000983001	0.920303
UBOX5	-0.236357	3.1318	0.00102622	0.920303
C10orf35	-1.1219	-3.40213	0.00105665	0.920303
SPOCK3	-0.916087	-4.28532	0.00105832	0.920303
TEX9	-1.04247	-0.305889	0.00106751	0.920303
PELI1	-0.277182	5.87506	0.001138	0.920303
GALNT15	-1.05519	-3.90266	0.00114423	0.920303
TAS2R41	-0.803434	-4.32849	0.00117618	0.920303
LINC01393	1.03533	-3.66173	0.00124639	0.920303
OR2W3	-1.1188	-3.77504	0.00139622	0.920303
TATDN1	0.28497	3.59621	0.0014242	0.920303
TMEM246	-1.22528	-1.93902	0.00152537	0.920303
YIPF5	0.179326	4.94415	0.00155539	0.920303
RNVU1-17	-1.27356	-3.13995	0.0015721	0.920303
MARCH9	-0.434958	3.49843	0.00160413	0.920303
LMOD2	-0.971644	-4.21723	0.00162004	0.920303
PROB1	-0.693536	1.21587	0.00162381	0.920303
CORO2B	-1.313	-3.26988	0.0016796	0.920303
BTBD9	-0.18506	4.84818	0.00172128	0.920303
AHCYL1	0.191518	6.32329	0.00176573	0.920303
HTR6	-1.06396	-3.63324	0.0018817	0.920303
KIR2DS5	-1.06428	-4.15136	0.00209757	0.920303
SERPINA9	-1.27089	-3.33351	0.00211739	0.920303
LINC00158	-1.121	-3.80647	0.00215486	0.920303
LINC01250	-0.774763	-4.44457	0.00222889	0.920303
TNFSF11	-1.05776	-3.50641	0.0023567	0.920303
XG	-0.63746	-4.43317	0.00237856	0.920303
CYP4F3	1.57082	-2.90783	0.00246853	0.920303
TP53I11	0.412287	4.01317	0.00265642	0.920303
LINC01122	-1.07788	-3.36319	0.00270646	0.920303
NRF1	-0.205181	4.26546	0.00279326	0.920303
CD9	0.789938	6.62504	0.00285755	0.920303
PTPMT1	0.271114	3.97541	0.00285847	0.920303
TFAP2A-AS1	0.870202	-4.24533	0.00292863	0.920303
ZHX2	-0.302159	5.17941	0.0029849	0.920303
SPEF1	0.87928	-4.18064	0.00319518	0.920303
CADPS	-1.11157	-3.80466	0.00334007	0.920303
OPHN1	0.519982	2.40888	0.00349362	0.920303
MTUS2	1.01803	-1.61456	0.00358156	0.920303
MMP23B	-1.08269	-1.60252	0.00371626	0.920303
PCDHGA10	0.677375	0.437867	0.0038055	0.920303
KLHL8	0.18888	4.76341	0.00388789	0.920303
GID8	0.106409	5.72075	0.00392382	0.920303
SLX4IP	0.187725	4.29466	0.00402411	0.920303
NACA2	-0.864875	-2.77786	0.00405969	0.920303
C16orf58	0.219712	4.65974	0.00406849	0.920303
RAPGEF4	-1.09759	-3.48157	0.00407127	0.920303
ATP6AP1L	0.403134	0.796097	0.00416779	0.920303
LINC01215	-0.806383	0.816651	0.00417088	0.920303
CREB3L3	-0.956704	-3.9654	0.00422034	0.920303
SLC39A9	0.145176	6.03304	0.00433209	0.920303
SLC25A40	0.265522	4.40676	0.00434076	0.920303
INMT	-0.688404	-4.42577	0.00436261	0.920303
KCNJ1	-1.08335	-1.38789	0.0044155	0.920303
PRDM16	-1.2975	-1.56375	0.00443684	0.920303
HINT2	0.310336	1.80175	0.00454437	0.920303
MAP3K7	0.123452	5.65318	0.00497339	0.920303
SLC25A3	0.174293	6.69846	0.0049838	0.920303
NUDT13	0.425689	1.39866	0.00504188	0.920303
TSPAN13	-0.961551	0.314879	0.0050424	0.920303
FLJ26850	1.44565	-3.0023	0.00506534	0.920303
CLEC18B	1.09769	-2.85009	0.00523746	0.920303
PIAS2	0.230437	4.37173	0.0053471	0.920303
THUMPD3	0.137314	5.46977	0.00539696	0.920303
CSE1L	0.152581	5.40058	0.00539729	0.920303
HSF2BP	0.901907	-1.41643	0.00545673	0.920303
MIR3180-4	-1.07918	-3.59373	0.00545966	0.920303
MTL5	-0.810069	-0.247187	0.0055276	0.920303
COX8A	0.22764	4.3652	0.00579003	0.920303
UBE2NL	-0.677115	-4.34621	0.00586175	0.920303
GPR33	-0.812342	-4.05982	0.00589098	0.920303
SURF2	-0.207744	2.50381	0.00589831	0.920303
NRXN1	-0.975629	-2.85447	0.00591834	0.920303
ACP1	0.128913	5.20623	0.00601677	0.920303
LINC01013	-1.00639	-3.93671	0.00603201	0.920303
SETSIP	0.763939	-2.33911	0.00609063	0.920303
TRABD2B	-0.579581	-4.48056	0.00611402	0.920303
ZNF846	0.259228	2.62811	0.00622336	0.920303
ADK	0.271833	4.22117	0.0062507	0.920303
TRIM29	-0.789228	-4.08112	0.00631342	0.920303
ACVR2A	0.233296	3.39531	0.00632553	0.920303
PCDH18	-0.561537	-4.58751	0.0063418	0.920303
ZNF33B	-0.264271	4.14874	0.00655332	0.920303
GDF11	-0.36924	3.29207	0.00659315	0.920303
RHAG	-0.672044	-4.38579	0.00664764	0.920303
GABBR1	-0.376394	3.50059	0.0066501	0.920303
CMC1	0.201795	4.11897	0.00673779	0.920303
MIR5188	0.599578	-4.54239	0.00676738	0.920303
CHEK2	0.42124	1.89244	0.00686252	0.920303
RHBDL2	1.09145	-2.251	0.00686446	0.920303
GPR75	-0.40659	1.33463	0.00688442	0.920303
MIR632	-0.436745	-4.63311	0.0070189	0.920303
PCDH17	-0.822336	-4.15321	0.00716525	0.920303
HIST2H3C	-1.19677	0.578958	0.00718972	0.920303
ACTN2	-0.871464	-1.8389	0.00722873	0.920303
MUT	0.206238	4.63495	0.00726999	0.920303
FAM136A	0.259531	4.21127	0.0073359	0.920303
MTERF3	0.256766	2.65252	0.00735008	0.920303
SALL3	0.444365	-4.67475	0.00739136	0.920303
NRXN3	-0.838234	-3.94395	0.00742515	0.920303
CTPS1	0.376182	3.4117	0.00742569	0.920303
DENND2A	-0.914933	-3.89484	0.00745425	0.920303
UTS2	-1.16296	-3.85958	0.00746632	0.920303
RBM6	-0.112731	6.69939	0.00748494	0.920303
TTTY14	0.790897	-1.26124	0.00749335	0.920303
ZBTB20-AS4	1.0681	-3.57195	0.00755205	0.920303
CPEB1-AS1	0.913149	-3.83352	0.00756859	0.920303
TPSAB1	-1.01965	2.40426	0.00757787	0.920303
LINC01010	1.36382	-0.238583	0.00779659	0.920303
PRR36	-0.769227	-4.23368	0.00785678	0.920303
PLSCR4	-1.241	-1.90713	0.00788311	0.920303
NDUFB6	0.310415	2.88764	0.00789389	0.920303
LINC00273	-0.711594	-4.15656	0.00789437	0.920303
SH3RF3	0.715274	1.05286	0.0079038	0.920303
ABCG2	1.18724	-0.457056	0.00792895	0.920303
TMEM33	0.191284	6.21819	0.0079384	0.920303
LGALSL	-0.886026	-1.33176	0.00801167	0.920303
APOC2	1.40667	-2.19391	0.00801543	0.920303
SNRPB2	0.139108	5.41673	0.00810096	0.920303
TMEM155	-0.687971	-4.42804	0.00814676	0.920303
MALRD1	-1.0075	-3.60338	0.00830668	0.920303
SMCO3	-1.05564	-2.39473	0.00844978	0.920303
RXRG	0.393162	-4.69958	0.00845658	0.920303
CD34	-0.87107	1.12061	0.00852459	0.920303
CACNB1	-0.243155	2.44312	0.00856392	0.920303
ANGPTL2	-0.757393	-1.30565	0.00873347	0.920303
SUCLG2	0.261073	4.35678	0.00880515	0.920303
MCMDC2	0.491059	0.5885	0.00895054	0.920303
UGT1A7	0.67024	-4.61591	0.0089819	0.920303
MDH2	0.221659	5.68781	0.00902362	0.920303
ATAD1	0.128855	4.78688	0.00908582	0.920303
KANSL1-AS1	0.538935	-0.479192	0.00908705	0.920303
ALG9	0.175619	3.88407	0.0090926	0.920303
GCSH	0.515311	1.87895	0.00917187	0.920303
PRMT9	0.140631	3.60095	0.00926123	0.920303
HEXA-AS1	0.298344	1.37709	0.00936794	0.920303
PROK2	-1.09823	0.276086	0.00944393	0.920303
WDR34	-0.35417	1.74934	0.00946737	0.920303
MUC19	-0.88393	-4.18783	0.00952935	0.920303
UCK2	0.284854	3.43823	0.00953012	0.920303
ERCC4	0.157637	4.37427	0.00953016	0.920303
TMEM41B	0.127172	5.04808	0.00968248	0.920303
ZNF521	-0.879002	1.20426	0.00979371	0.920303
TIGD2	0.23791	3.22772	0.00987856	0.920303
ZNF726	-0.554082	-0.40136	0.00988999	0.920303
ARX	-0.463207	-4.63489	0.00997568	0.920303

## Sheet: Table S9
Supplemental Table 9: CAMERA gene set enrichment (RSTR vs. LTBI), Overlap between Uganda and SA, MSigDB collections C2+C7
	GSEA_category	NGenes	Ug_direction	Ug_PValue	Ug_FDR	SA_direction	SA_PValue	SA_FDR	Carbon metabolism	antiviral/T1IFN	Contrast cell populations	Other
219	GSE36888_UNTREATED_VS_IL2_TREATED_STAT5_AB_KNOCKIN_TCELL_6H_DN	191	Up	9.1993e-10	7.12504e-08	Up	8.81588e-24	8.41828e-20				1
381	REACTOME_RESPIRATORY_ELECTRON_TRANSPORT_ATP_SYNTHESIS_BY_CHEMIOSMOTIC_COUPLING_AND_HEAT_PRODUCTION_BY_UNCOUPLING_PROTEINS_	80	Up	3.19958e-15	1.45474e-12	Up	6.68206e-20	3.19035e-16	1
150	GSE22886_DAY1_VS_DAY7_MONOCYTE_IN_CULTURE_DN	193	Up	4.44163e-13	1.03436e-10	Up	1.14379e-18	2.73052e-15			1
149	GSE22886_DAY0_VS_DAY7_MONOCYTE_IN_CULTURE_DN	188	Up	2.98337e-09	1.91176e-07	Up	1.04891e-18	2.73052e-15			1
380	REACTOME_RESPIRATORY_ELECTRON_TRANSPORT	64	Up	1.61756e-13	4.5425e-11	Up	1.44402e-18	2.75779e-15	1
383	REACTOME_TCA_CYCLE_AND_RESPIRATORY_ELECTRON_TRANSPORT	116	Up	3.95249e-16	2.90295e-13	Up	2.68763e-18	4.27737e-15	1
337	MOOTHA_VOXPHOS	85	Up	1.55752e-13	4.50643e-11	Up	7.62803e-17	1.04057e-13	1
142	GSE22432_MULTIPOTENT_VS_COMMON_DC_PROGENITOR_UNTREATED_UP	193	Up	1.15862e-10	1.38033e-08	Up	9.9142e-15	1.18338e-11			1
334	MOOTHA_HUMAN_MITODB_6_2002	420	Up	4.09213e-09	2.50459e-07	Up	1.05714e-13	1.00946e-10	1
210	GSE31082_DN_VS_DP_THYMOCYTE_UP	189	Up	5.06329e-08	1.98948e-06	Up	1.16389e-13	1.01036e-10			1
409	WONG_MITOCHONDRIA_GENE_MODULE	217	Up	4.12018e-09	2.5057e-07	Up	2.05364e-13	1.63419e-10	1
335	MOOTHA_MITOCHONDRIA	436	Up	1.65721e-09	1.13346e-07	Up	3.07296e-13	2.25721e-10	1
393	SCHLOSSER_MYC_TARGETS_REPRESSED_BY_SERUM	154	Up	1.33933e-07	4.20654e-06	Up	3.73883e-13	2.55015e-10				1
221	GSE36888_UNTREATED_VS_IL2_TREATED_TCELL_6H_DN	191	Up	4.27202e-11	6.18019e-09	Up	4.08003e-13	2.59734e-10				1
160	GSE22886_NEUTROPHIL_VS_DC_DN	195	Up	3.14222e-15	1.45474e-12	Up	6.31632e-13	3.76966e-10			1
130	GSE21360_SECONDARY_VS_TERTIARY_MEMORY_CD8_TCELL_UP	194	Up	1.14517e-09	8.47607e-08	Up	1.79301e-12	1.00714e-09			1
385	REACTOME_TRNA_AMINOACYLATION	42	Up	0.000152838	0.00109804	Up	2.44318e-12	1.26475e-09				1
313	KEGG_AMINOACYL_TRNA_BIOSYNTHESIS	41	Up	0.0017102	0.00760197	Up	2.51652e-12	1.26475e-09				1
395	SCHUHMACHER_MYC_TARGETS_UP	77	Up	6.39432e-07	1.46762e-05	Up	3.80794e-12	1.73153e-09				1
156	GSE22886_NAIVE_CD4_TCELL_VS_DC_DN	193	Up	3.30767e-13	7.89541e-11	Up	6.22844e-12	2.58589e-09			1
324	KEGG_VALINE_LEUCINE_AND_ISOLEUCINE_DEGRADATION	44	Up	3.2562e-06	5.13888e-05	Up	4.12439e-10	1.64099e-07	1
112	GSE18791_CTRL_VS_NEWCASTLE_VIRUS_DC_16H_UP	187	Up	1.33387e-13	4.10832e-11	Up	6.32389e-10	2.41547e-07		1
117	GSE18791_CTRL_VS_NEWCASTLE_VIRUS_DC_8H_UP	184	Up	5.57081e-13	1.182e-10	Up	7.34776e-10	2.69861e-07		1
271	GSE41867_NAIVE_VS_EFFECTOR_CD8_TCELL_DN	191	Up	3.45775e-07	9.12006e-06	Up	7.64463e-10	2.70365e-07			1
111	GSE18791_CTRL_VS_NEWCASTLE_VIRUS_DC_14H_UP	191	Up	1.44514e-11	2.33867e-09	Up	1.04115e-09	3.42825e-07		1
38	GSE14000_UNSTIM_VS_16H_LPS_DC_UP	182	Up	1.55482e-13	4.50643e-11	Up	1.28287e-09	3.96389e-07				1
206	GSE30971_WBP7_HET_VS_KO_MACROPHAGE_2H_LPS_STIM_UP	183	Up	2.02389e-08	9.61396e-07	Up	1.64048e-09	4.7668e-07			1
144	GSE22432_PDC_VS_TGFB1_TREATEDCOMMON_DC_PROGENITOR_UP	191	Up	1.63956e-07	4.89204e-06	Up	1.64734e-09	4.7668e-07			1
345	PENG_GLUTAMINE_DEPRIVATION_DN	331	Up	1.16145e-10	1.38033e-08	Up	2.35535e-09	6.07871e-07	1
220	GSE36888_UNTREATED_VS_IL2_TREATED_TCELL_17H_UP	195	Up	2.43639e-12	4.74748e-10	Up	2.9033e-09	7.29569e-07				1
224	GSE37532_TREG_VS_TCONV_CD4_TCELL_FROM_LN_UP	190	Up	4.55529e-07	1.13859e-05	Up	3.78245e-09	9.26118e-07			1
200	GSE29617_CTRL_VS_DAY3_TIV_FLU_VACCINE_PBMC_2008_DN	187	Up	2.95393e-13	7.45048e-11	Up	4.10711e-09	9.80469e-07		1
392	SCHLOSSER_MYC_TARGETS_AND_SERUM_RESPONSE_UP	46	Up	0.000137351	0.00101113	Up	4.69343e-09	1.09311e-06				1
37	GSE14000_UNSTIM_VS_16H_LPS_DC_TRANSLATED_RNA_UP	185	Up	1.90072e-14	7.89047e-12	Up	5.50127e-09	1.25075e-06				1
151	GSE22886_DC_VS_MONOCYTE_UP	193	Up	3.56531e-07	9.37784e-06	Up	5.64887e-09	1.25444e-06			1
290	GSE6674_ANTI_IGM_VS_ANTI_IGM_AND_CPG_STIM_BCELL_DN	192	Up	7.06483e-05	0.000597476	Up	6.16761e-09	1.33851e-06				1
413	YAO_TEMPORAL_RESPONSE_TO_PROGESTERONE_CLUSTER_17	174	Up	1.14949e-10	1.38033e-08	Up	6.69893e-09	1.39061e-06				1
128	GSE20727_CTRL_VS_ROS_INH_AND_DNFB_ALLERGEN_TREATED_DC_UP	180	Up	2.06155e-06	3.6792e-05	Up	6.66764e-09	1.39061e-06				1
176	GSE24634_NAIVE_CD4_TCELL_VS_DAY5_IL4_CONV_TREG_DN	197	Up	1.27357e-10	1.47764e-08	Up	7.86952e-09	1.59885e-06			1
67	GSE16451_IMMATURE_VS_MATURE_NEURON_CELL_LINE_WEST_EQUINE_ENC_VIRUS_DN	191	Up	1.35859e-06	2.66911e-05	Up	8.96113e-09	1.7827e-06			1
161	GSE22886_NEUTROPHIL_VS_MONOCYTE_DN	195	Up	2.0385e-13	5.56103e-11	Up	1.33485e-08	2.60133e-06			1
368	REACTOME_MITOCHONDRIAL_PROTEIN_IMPORT	49	Up	6.66594e-05	0.000570819	Up	1.50584e-08	2.85351e-06	1
358	REACTOME_CITRIC_ACID_CYCLE_TCA_CYCLE	19	Up	4.40618e-05	0.000405301	Up	1.80285e-08	3.31066e-06	1
135	GSE21927_SPLEEN_C57BL6_VS_EL4_TUMOR_BALBC_MONOCYTES_DN	192	Up	8.83025e-10	6.91075e-08	Up	2.01856e-08	3.63683e-06			1
165	GSE22919_RESTING_VS_IL2_IL12_IL15_STIM_NK_CELL_UP	189	Up	7.37239e-07	1.62567e-05	Up	2.30722e-08	4.07994e-06				1
162	GSE22886_UNSTIM_VS_IL15_STIM_NKCELL_DN	195	Up	6.59758e-10	5.47771e-08	Up	2.39351e-08	4.15557e-06				1
331	MANALO_HYPOXIA_DN	275	Up	1.97888e-09	1.30306e-07	Up	2.49816e-08	4.18507e-06				1
61	GSE15930_NAIVE_VS_48H_IN_VITRO_STIM_IFNAB_CD8_TCELL_DN	191	Up	3.03565e-08	1.34811e-06	Up	2.49592e-08	4.18507e-06		1
157	GSE22886_NAIVE_CD8_TCELL_VS_DC_DN	195	Up	2.97352e-15	1.45474e-12	Up	2.71519e-08	4.4394e-06			1
171	GSE24210_CTRL_VS_IL35_TREATED_TCONV_CD4_TCELL_DN	191	Up	1.67046e-09	1.13346e-07	Up	2.97379e-08	4.73279e-06				1
163	GSE22886_UNSTIM_VS_IL2_STIM_NKCELL_DN	193	Up	1.49573e-09	1.05787e-07	Up	3.47078e-08	5.17851e-06				1
9	BURTON_ADIPOGENESIS_5	117	Up	2.60671e-05	0.000268199	Up	3.45348e-08	5.17851e-06				1
273	GSE42724_NAIVE_VS_B1_BCELL_DN	186	Up	6.05491e-06	8.20032e-05	Up	3.76955e-08	5.53775e-06			1
255	GSE411_100MIN_VS_400MIN_IL6_STIM_MACROPHAGE_DN	191	Up	1.77285e-07	5.19239e-06	Up	4.05522e-08	5.86717e-06				1
148	GSE22886_CTRL_VS_LPS_24H_DC_UP	197	Up	5.14661e-17	4.91398e-14	Up	4.19128e-08	5.93108e-06				1
411	YAO_TEMPORAL_RESPONSE_TO_PROGESTERONE_CLUSTER_13	167	Up	4.70915e-10	4.32336e-08	Up	4.22362e-08	5.93108e-06				1
214	GSE36476_CTRL_VS_TSST_ACT_16H_MEMORY_CD4_TCELL_OLD_DN	195	Up	1.86372e-07	5.42268e-06	Up	4.9968e-08	6.72035e-06				1
235	GSE3982_DC_VS_NEUTROPHIL_UP	195	Up	4.52507e-06	6.54627e-05	Up	4.92058e-08	6.72035e-06			1
369	REACTOME_MITOCHONDRIAL_TRNA_AMINOACYLATION	21	Up	0.00100835	0.00501181	Up	4.94071e-08	6.72035e-06	1
164	GSE22886_UNSTIM_VS_STIM_MEMORY_TCELL_DN	191	Up	1.10925e-07	3.59021e-06	Up	5.16226e-08	6.84645e-06				1
263	GSE41867_DAY8_EFFECTOR_VS_DAY30_MEMORY_CD8_TCELL_LCMV_ARMSTRONG_UP	192	Up	1.42923e-08	7.29747e-07	Up	5.24558e-08	6.86165e-06			1
133	GSE21927_BALBC_VS_C57BL6_MONOCYTE_TUMOR_UP	194	Up	1.09458e-07	3.55478e-06	Up	5.50139e-08	6.91221e-06			1
262	GSE41867_DAY6_VS_DAY8_LCMV_ARMSTRONG_EFFECTOR_CD8_TCELL_DN	188	Up	8.40542e-07	1.80108e-05	Up	5.44321e-08	6.91221e-06				1
314	KEGG_CITRATE_CYCLE_TCA_CYCLE	30	Up	1.89073e-05	0.000209591	Up	6.05757e-08	7.51218e-06	1
152	GSE22886_IGM_MEMORY_BCELL_VS_BLOOD_PLASMA_CELL_DN	196	Up	2.41714e-07	6.76798e-06	Up	6.49334e-08	7.94934e-06			1
326	KRIGE_RESPONSE_TO_TOSEDOSTAT_24HR_DN	946	Up	1.31096e-09	9.41134e-08	Up	6.78879e-08	8.20584e-06				1
158	GSE22886_NAIVE_TCELL_VS_DC_DN	198	Up	3.54807e-12	6.62777e-10	Up	7.53531e-08	8.93558e-06			1
223	GSE369_SOCS3_KO_VS_WT_LIVER_UP	191	Up	1.41492e-08	7.26324e-07	Up	7.57966e-08	8.93558e-06			1
115	GSE18791_CTRL_VS_NEWCASTLE_VIRUS_DC_4H_UP	174	Up	6.80148e-09	3.79769e-07	Up	8.60377e-08	9.89849e-06		1
329	LEE_BMP2_TARGETS_DN	847	Up	7.90612e-08	2.77528e-06	Up	8.9437e-08	1.01671e-05				1
172	GSE24210_RESTING_TREG_VS_TCONV_DN	190	Up	4.28125e-08	1.7675e-06	Up	9.11083e-08	1.02352e-05			1
187	GSE2770_UNTREATED_VS_ACT_CD4_TCELL_48H_UP	186	Up	2.06634e-05	0.000224709	Up	1.01662e-07	1.1288e-05				1
289	GSE6259_FLT3L_INDUCED_33D1_POS_DC_VS_BCELL_UP	181	Up	6.55689e-06	8.84254e-05	Up	1.22613e-07	1.31554e-05			1
222	GSE36888_UNTREATED_VS_IL2_TREATED_TCELL_6H_UP	180	Up	2.84883e-06	4.62596e-05	Down	1.29047e-07	1.36919e-05				1
60	GSE15930_NAIVE_VS_48H_IN_VITRO_STIM_CD8_TCELL_DN	193	Up	5.84189e-10	5.11728e-08	Up	1.46701e-07	1.53939e-05				1
104	GSE17974_CTRL_VS_ACT_IL4_AND_ANTI_IL12_12H_CD4_TCELL_DN	187	Up	1.1497e-06	2.3257e-05	Up	1.54961e-07	1.6084e-05				1
36	GSE14000_TRANSLATED_RNA_VS_MRNA_DC_UP	191	Up	6.85785e-06	9.15786e-05	Up	1.63712e-07	1.68095e-05				1
95	GSE17721_POLYIC_VS_GARDIQUIMOD_16H_BMDC_DN	182	Up	4.80595e-06	6.86934e-05	Up	1.85488e-07	1.88428e-05				1
408	WONG_EMBRYONIC_STEM_CELL_CORE	332	Up	4.26122e-08	1.7675e-06	Up	1.99387e-07	1.98328e-05				1
343	OUELLET_OVARIAN_CANCER_INVASIVE_VS_LMP_UP	117	Up	2.86043e-07	7.78102e-06	Up	2.27776e-07	2.24231e-05			1
109	GSE18791_CTRL_VS_NEWCASTLE_VIRUS_DC_10H_UP	183	Up	1.96746e-08	9.39264e-07	Up	2.44633e-07	2.3596e-05		1
145	GSE22589_HEALTHY_VS_HIV_AND_SIV_INFECTED_DC_UP	187	Up	1.87608e-05	0.000208289	Up	2.47757e-07	2.36583e-05				1
244	GSE3982_MAST_CELL_VS_NEUTROPHIL_UP	193	Up	1.35489e-05	0.000159513	Up	2.57318e-07	2.40895e-05			1
46	GSE14769_UNSTIM_VS_360MIN_LPS_BMDM_UP	188	Up	1.29246e-09	9.3488e-08	Up	2.84207e-07	2.63484e-05				1
114	GSE18791_CTRL_VS_NEWCASTLE_VIRUS_DC_18H_UP	184	Up	1.82003e-15	1.11563e-12	Up	2.90497e-07	2.65084e-05		1
336	MOOTHA_TCA	16	Up	0.000562057	0.00314383	Up	2.91484e-07	2.65084e-05	1
374	REACTOME_PROCESSING_OF_CAPPED_INTRON_CONTAINING_PRE_MRNA	132	Up	5.12633e-07	1.23915e-05	Up	3.02009e-07	2.72065e-05				1
31	GSE13485_DAY1_VS_DAY21_YF17D_VACCINE_PBMC_DN	182	Up	1.42216e-07	4.38024e-06	Up	3.12252e-07	2.78663e-05		1
412	YAO_TEMPORAL_RESPONSE_TO_PROGESTERONE_CLUSTER_14	136	Up	5.9375e-09	3.41513e-07	Up	3.33279e-07	2.89317e-05				1
339	MOREAUX_MULTIPLE_MYELOMA_BY_TACI_DN	162	Up	1.49537e-06	2.8844e-05	Up	3.31913e-07	2.89317e-05				1
102	GSE17974_0H_VS_6H_IN_VITRO_ACT_CD4_TCELL_DN	190	Up	4.81965e-07	1.18298e-05	Up	4.01837e-07	3.45688e-05				1
391	SCHLOSSER_MYC_TARGETS_AND_SERUM_RESPONSE_DN	46	Up	3.10673e-07	8.35578e-06	Up	4.19604e-07	3.51328e-05				1
295	GSE7568_IL4_TGFB_DEXAMETHASONE_VS_IL4_TGFB_TREATED_MACROPHAGE_UP	167	Up	4.7078e-07	1.16451e-05	Up	4.23109e-07	3.51328e-05				1
143	GSE22432_MULTIPOTENT_VS_COMMON_DC_PROGENITOR_UP	191	Up	9.43229e-07	1.97933e-05	Up	4.43416e-07	3.61896e-05			1
105	GSE17974_CTRL_VS_ACT_IL4_AND_ANTI_IL12_24H_CD4_TCELL_DN	186	Up	6.02917e-08	2.25602e-06	Up	4.57908e-07	3.70556e-05				1
242	GSE3982_MAC_VS_NEUTROPHIL_LPS_STIM_UP	192	Up	1.28566e-05	0.000153521	Up	4.72907e-07	3.79478e-05			1
110	GSE18791_CTRL_VS_NEWCASTLE_VIRUS_DC_12H_UP	186	Up	4.35332e-10	4.07505e-08	Up	5.30165e-07	4.21879e-05		1
204	GSE30971_CTRL_VS_LPS_STIM_MACROPHAGE_WBP7_KO_2H_DN	185	Up	4.57872e-19	7.38918e-16	Up	5.43975e-07	4.2929e-05				1
57	GSE15930_NAIVE_VS_24H_IN_VITRO_STIM_CD8_TCELL_DN	195	Up	2.91676e-10	3.0263e-08	Up	5.55948e-07	4.31605e-05				1
267	GSE41867_NAIVE_VS_DAY15_LCMV_EFFECTOR_CD8_TCELL_UP	188	Up	1.2484e-06	2.48101e-05	Up	5.5457e-07	4.31605e-05		1
303	GSE9960_HEALTHY_VS_GRAM_NEG_SEPSIS_PBMC_UP	191	Up	1.86951e-15	1.11563e-12	Up	5.70489e-07	4.3274e-05				1
367	REACTOME_METABOLISM_OF_NON_CODING_RNA	47	Up	3.39562e-05	0.000327489	Up	5.71469e-07	4.3274e-05				1
247	GSE3982_NEUTROPHIL_VS_TH2_DN	191	Up	0.00234525	0.00975064	Up	5.63938e-07	4.3274e-05			1
166	GSE23114_PERITONEAL_CAVITY_B1A_BCELL_VS_SPLEEN_BCELL_DN	192	Up	4.37531e-08	1.78722e-06	Up	6.22766e-07	4.60992e-05			1
410	YAO_TEMPORAL_RESPONSE_TO_PROGESTERONE_CLUSTER_10	67	Up	6.08247e-07	1.41303e-05	Up	6.60516e-07	4.81471e-05				1
402	TIEN_INTESTINE_PROBIOTICS_24HR_UP	541	Up	6.90292e-11	9.02864e-09	Up	6.73861e-07	4.87477e-05				1
405	WEI_MYCN_TARGETS_WITH_E_BOX	746	Up	7.97935e-10	6.3489e-08	Up	6.93691e-07	4.98049e-05				1
181	GSE25123_WT_VS_PPARG_KO_MACROPHAGE_DN	192	Up	1.35462e-05	0.000159513	Up	7.04014e-07	5.01688e-05			1
183	GSE2706_UNSTIM_VS_8H_LPS_DC_UP	183	Up	1.01021e-09	7.65514e-08	Up	7.20975e-07	5.0997e-05				1
264	GSE41867_DAY8_VS_DAY15_LCMV_CLONE13_EFFECTOR_CD8_TCELL_DN	187	Up	2.51459e-06	4.23445e-05	Up	7.3936e-07	5.19129e-05			1
287	GSE5589_LPS_VS_LPS_AND_IL6_STIM_MACROPHAGE_45MIN_DN	186	Up	6.78395e-07	1.53128e-05	Up	7.66238e-07	5.34073e-05				1
62	GSE15930_NAIVE_VS_48H_IN_VITRO_STIM_IL12_CD8_TCELL_DN	191	Up	5.72761e-09	3.33458e-07	Up	7.74628e-07	5.36009e-05				1
22	GSE10239_MEMORY_VS_DAY4.5_EFF_CD8_TCELL_DN	191	Up	2.89699e-05	0.000289033	Up	8.11521e-07	5.57497e-05			1
71	GSE1740_MCSF_VS_MCSF_AND_IFNG_DAY2_DERIVED_MACROPHAGE_WITH_IFNA_STIM_UP	188	Up	1.32433e-08	6.90967e-07	Up	8.74943e-07	5.96774e-05			1
291	GSE6674_ANTI_IGM_VS_PL2_3_STIM_BCELL_DN	197	Up	6.6982e-05	0.000572043	Up	9.0214e-07	6.1096e-05				1
208	GSE31082_DN_VS_CD4_SP_THYMOCYTE_UP	183	Up	3.93581e-06	5.91797e-05	Up	9.47721e-07	6.28458e-05			1
239	GSE3982_EOSINOPHIL_VS_TH2_DN	189	Up	8.12433e-08	2.83106e-06	Up	9.7444e-07	6.37324e-05			1
272	GSE41867_NAIVE_VS_EFFECTOR_CD8_TCELL_UP	188	Up	9.13757e-07	1.92171e-05	Up	9.72425e-07	6.37324e-05			1
252	GSE40666_UNTREATED_VS_IFNA_STIM_CD8_TCELL_90MIN_DN	182	Up	1.33025e-12	2.70238e-10	Up	1.11058e-06	7.16547e-05		1
237	GSE3982_EOSINOPHIL_VS_MAST_CELL_DN	190	Up	5.09778e-07	1.23537e-05	Up	1.12927e-06	7.23716e-05			1
180	GSE25088_WT_VS_STAT6_KO_MACROPHAGE_ROSIGLITAZONE_STIM_UP	175	Up	3.68031e-06	5.60441e-05	Up	1.16409e-06	7.41062e-05			1
318	KEGG_PROPANOATE_METABOLISM	32	Up	3.27311e-06	5.15703e-05	Up	1.17467e-06	7.4284e-05	1
363	REACTOME_FORMATION_OF_ATP_BY_CHEMIOSMOTIC_COUPLING	13	Up	9.03216e-06	0.00011468	Up	1.20542e-06	7.57276e-05	1
174	GSE24574_NAIVE_VS_TCONV_CD4_TCELL_DN	194	Up	4.81313e-07	1.18298e-05	Up	1.28948e-06	7.99561e-05			1
155	GSE22886_NAIVE_CD4_TCELL_VS_48H_ACT_TH1_DN	192	Up	1.84132e-09	1.23809e-07	Up	1.48562e-06	9.09368e-05				1
327	KRIGE_RESPONSE_TO_TOSEDOSTAT_6HR_DN	848	Up	4.94967e-09	2.97229e-07	Up	1.49753e-06	9.10825e-05				1
140	GSE22432_MULTIPOTENT_PROGENITOR_VS_PDC_DN	187	Up	1.47425e-06	2.85521e-05	Up	1.72046e-06	0.000102679			1
58	GSE15930_NAIVE_VS_24H_IN_VITRO_STIM_IL12_CD8_TCELL_DN	195	Up	4.8338e-09	2.92108e-07	Up	1.75225e-06	0.000103285				1
401	STEIN_ESRRA_TARGETS_UP	367	Up	7.40367e-07	1.62881e-05	Up	1.75123e-06	0.000103285				1
354	REACTOME_BIOSYNTHESIS_OF_THE_N_GLYCAN_PRECURSOR_DOLICHOL_LIPID_LINKED_OLIGOSACCHARIDE_LLO_AND_TRANSFER_TO_A_NASCENT_PROTEIN	28	Up	4.82311e-06	6.87329e-05	Up	1.77481e-06	0.000103973	1
238	GSE3982_EOSINOPHIL_VS_TH1_DN	195	Up	4.81337e-08	1.93101e-06	Up	1.88856e-06	0.00010931			1
236	GSE3982_EOSINOPHIL_VS_DC_DN	190	Up	3.22693e-09	2.03013e-07	Up	2.04128e-06	0.00011672				1
296	GSE7568_IL4_VS_IL4_AND_TGFB_TREATED_MACROPHAGE_24H_DN	182	Up	2.67363e-06	4.42532e-05	Up	2.10792e-06	0.000119813				1
59	GSE15930_NAIVE_VS_24H_IN_VITRO_STIM_INFAB_CD8_TCELL_DN	194	Up	7.45824e-10	6.03485e-08	Up	2.1625e-06	0.000122188				1
246	GSE3982_NEUTROPHIL_VS_TH1_DN	191	Up	0.000283613	0.00182353	Up	2.22495e-06	0.000124977			1
186	GSE2770_TGFB_AND_IL4_VS_IL12_TREATED_ACT_CD4_TCELL_6H_DN	190	Up	4.52306e-07	1.13349e-05	Up	2.27579e-06	0.000126346				1
141	GSE22432_MULTIPOTENT_VS_COMMON_DC_PROGENITOR_UNTREATED_DN	191	Up	4.69515e-07	1.1644e-05	Up	2.58162e-06	0.000140868			1
122	GSE18893_TCONV_VS_TREG_24H_TNF_STIM_UP	190	Up	3.72969e-10	3.59708e-08	Up	2.9893e-06	0.000159392			1
355	REACTOME_BRANCHED_CHAIN_AMINO_ACID_CATABOLISM	17	Up	0.000513607	0.0029138	Up	2.98285e-06	0.000159392	1
370	REACTOME_MRNA_SPLICING	104	Up	4.8043e-07	1.18298e-05	Up	3.03372e-06	0.00016005				1
79	GSE17721_CPG_VS_GARDIQUIMOD_1H_BMDC_DN	193	Up	1.0081e-06	2.09702e-05	Up	3.05727e-06	0.000160406				1
230	GSE3920_UNTREATED_VS_IFNG_TREATED_ENDOTHELIAL_CELL_DN	174	Up	8.23579e-08	2.85122e-06	Up	3.23988e-06	0.000168139				1
365	REACTOME_HIV_INFECTION	187	Up	0.000509906	0.00289969	Up	3.2706e-06	0.000168816				1
275	GSE43863_TH1_VS_TFH_MEMORY_CD4_TCELL_UP	194	Up	8.12501e-05	0.000660797	Up	3.43012e-06	0.000176098			1
101	GSE17974_0H_VS_12H_IN_VITRO_ACT_CD4_TCELL_DN	187	Up	1.6622e-07	4.92879e-06	Up	3.48075e-06	0.000177742				1
205	GSE30971_CTRL_VS_LPS_STIM_MACROPHAGE_WBP7_KO_4H_DN	180	Up	7.23885e-05	0.000607351	Up	3.57694e-06	0.000181682				1
184	GSE27241_WT_VS_RORGT_KO_TH17_POLARIZED_CD4_TCELL_DN	160	Up	7.89386e-08	2.77528e-06	Up	3.67559e-06	0.000185705			1
91	GSE17721_PAM3CSK4_VS_GADIQUIMOD_12H_BMDC_UP	194	Up	4.02798e-05	0.000374845	Up	3.74134e-06	0.000188032				1
177	GSE24634_TREG_VS_TCONV_POST_DAY5_IL4_CONVERSION_UP	192	Up	4.73861e-08	1.90904e-06	Up	3.85489e-06	0.000192725			1
48	GSE14908_ATOPIC_VS_NONATOPIC_PATIENT_RESTING_CD4_TCELL_DN	190	Up	2.19218e-08	1.02433e-06	Up	4.0068e-06	0.000198243			1
50	GSE15271_CXCR4_POS_VS_NEG_GC_BCELL_UP	172	Up	5.00056e-06	7.08388e-05	Up	3.99686e-06	0.000198243			1
243	GSE3982_MAC_VS_NEUTROPHIL_UP	185	Up	1.74912e-06	3.22404e-05	Up	4.02901e-06	0.000198314			1
14	DIAZ_CHRONIC_MEYLOGENOUS_LEUKEMIA_UP	1361	Up	5.01074e-11	6.83465e-09	Up	4.08727e-06	0.00020015				1
215	GSE36476_CTRL_VS_TSST_ACT_16H_MEMORY_CD4_TCELL_YOUNG_DN	193	Up	9.37065e-06	0.000118191	Up	4.19905e-06	0.000204575			1
154	GSE22886_NAIVE_CD4_TCELL_VS_12H_ACT_TH2_DN	193	Up	2.63293e-07	7.32922e-06	Up	4.43952e-06	0.000214106			1
30	GSE13484_12H_UNSTIM_VS_YF17D_VACCINE_STIM_PBMC_UP	189	Up	4.95296e-10	4.50389e-08	Up	4.49516e-06	0.000215213		1
88	GSE17721_LPS_VS_POLYIC_12H_BMDC_UP	194	Up	0.00133822	0.00627263	Up	4.68293e-06	0.000222474				1
66	GSE16450_CTRL_VS_IFNA_12H_STIM_IMMATURE_NEURON_CELL_LINE_UP	176	Up	7.47566e-05	0.000623385	Up	4.7762e-06	0.000225782		1
332	MENSSEN_MYC_TARGETS	51	Up	5.0525e-08	1.98948e-06	Up	4.93057e-06	0.00023101				1
10	BURTON_ADIPOGENESIS_6	183	Up	6.19487e-07	1.43217e-05	Up	4.93517e-06	0.00023101				1
378	REACTOME_PYRUVATE_METABOLISM_AND_CITRIC_ACID_TCA_CYCLE	40	Up	4.00769e-07	1.02588e-05	Up	4.98049e-06	0.000231994	1
265	GSE41867_LCMV_ARMSTRONG_VS_CLONE13_DAY6_EFFECTOR_CD8_TCELL_DN	190	Up	4.95431e-05	0.000446683	Up	5.02146e-06	0.000232766			1
116	GSE18791_CTRL_VS_NEWCASTLE_VIRUS_DC_6H_UP	182	Up	1.67383e-09	1.13346e-07	Up	5.11047e-06	0.000234615		1
293	GSE6674_UNSTIM_VS_ANTI_IGM_STIM_BCELL_UP	152	Up	1.34316e-05	0.000158523	Up	5.09885e-06	0.000234615				1
159	GSE22886_NAIVE_TCELL_VS_NEUTROPHIL_UP	193	Up	2.48226e-05	0.000259023	Up	5.18078e-06	0.000236705			1
357	REACTOME_CHOLESTEROL_BIOSYNTHESIS	21	Up	2.69686e-07	7.42064e-06	Up	6.37767e-06	0.000285917	1
218	GSE36888_STAT5_AB_KNOCKIN_VS_WT_TCELL_IL2_TREATED_2H_UP	190	Up	4.03085e-10	3.81055e-08	Up	6.98839e-06	0.00031007			1
18	GOLDRATH_HOMEOSTATIC_PROLIFERATION	166	Up	5.90216e-06	8.02761e-05	Up	7.01384e-06	0.00031007				1
394	SCHMIDT_POR_TARGETS_IN_LIMB_BUD_UP	25	Up	5.30759e-05	0.000471863	Up	6.99228e-06	0.00031007				1
344	PELLICCIOTTA_HDAC_IN_ANTIGEN_PRESENTATION_UP	62	Up	4.04418e-06	6.00527e-05	Up	7.50428e-06	0.000330223				1
382	REACTOME_RNA_POL_II_TRANSCRIPTION	96	Up	0.00156738	0.00708547	Up	8.13992e-06	0.000354923				1
195	GSE27859_DC_VS_CD11C_INT_F480_INT_DC_DN	198	Up	3.37624e-06	5.26738e-05	Up	8.56057e-06	0.000371568			1
3	ALONSO_METASTASIS_UP	190	Up	3.0219e-06	4.84926e-05	Up	9.10715e-06	0.000393503				1
153	GSE22886_NAIVE_BCELL_VS_DC_DN	195	Up	5.17584e-13	1.12533e-10	Up	9.8958e-06	0.000425653			1
406	WELCSH_BRCA1_TARGETS_DN	139	Up	7.1995e-07	1.59867e-05	Up	1.10433e-05	0.000466605				1
44	GSE1460_NAIVE_CD4_TCELL_CORD_BLOOD_VS_THYMIC_STROMAL_CELL_DN	189	Up	1.56167e-06	2.98216e-05	Up	1.14811e-05	0.000482965			1
7	BORCZUK_MALIGNANT_MESOTHELIOMA_UP	295	Up	6.72001e-10	5.53127e-08	Up	1.19451e-05	0.000498094				1
182	GSE26156_DOUBLE_POSITIVE_VS_CD4_SINGLE_POSITIVE_THYMOCYTE_DN	198	Up	2.41831e-06	4.12506e-05	Up	1.19041e-05	0.000498094			1
274	GSE43863_NAIVE_VS_MEMORY_LY6C_INT_CXCR5POS_CD4_TCELL_D150_LCMV_DN	190	Up	7.12007e-06	9.45513e-05	Up	1.21359e-05	0.000503853			1
241	GSE3982_MAC_VS_EFF_MEMORY_CD4_TCELL_UP	190	Up	3.23922e-11	4.90829e-09	Up	1.22453e-05	0.000504009			1
134	GSE21927_GMCSF_IL6_VS_GMCSF_GCSF_TREATED_BONE_MARROW_DN	191	Up	1.37897e-07	4.26096e-06	Up	1.22373e-05	0.000504009				1
292	GSE6674_UNSTIM_VS_ANTI_IGM_AND_CPG_STIM_BCELL_DN	194	Up	0.000425985	0.00252628	Up	1.25137e-05	0.000512846				1
197	GSE28726_ACT_CD4_TCELL_VS_ACT_VA24NEG_NKTCELL_UP	195	Up	4.312e-07	1.08918e-05	Up	1.28044e-05	0.00052252			1
173	GSE24574_BCL6_LOW_TFH_VS_TCONV_CD4_TCELL_DN	198	Up	9.25329e-10	7.12504e-08	Up	1.29877e-05	0.000525675			1
56	GSE15624_CTRL_VS_6H_HALOFUGINONE_TREATED_CD4_TCELL_DN	151	Up	9.65195e-07	2.01216e-05	Up	1.29919e-05	0.000525675				1
312	KARLSSON_TGFB1_TARGETS_UP	122	Up	4.22133e-06	6.1956e-05	Up	1.32629e-05	0.000529904				1
123	GSE19825_CD24LOW_VS_IL2RA_HIGH_DAY3_EFF_CD8_TCELL_DN	188	Up	1.71613e-05	0.000193455	Up	1.31961e-05	0.000529904			1
21	GSE10239_KLRG1INT_VS_KLRG1HIGH_EFF_CD8_TCELL_UP	188	Up	0.00071707	0.00379944	Up	1.32216e-05	0.000529904			1
302	GSE9960_GRAM_NEG_VS_GRAM_POS_SEPSIS_PBMC_DN	191	Up	1.3067e-13	4.10832e-11	Up	1.3767e-05	0.000547755				1
258	GSE41176_UNSTIM_VS_ANTI_IGM_STIM_TAK1_KO_BCELL_24H_UP	192	Up	0.000296175	0.001884	Up	1.53805e-05	0.000609413				1
178	GSE24671_BAKIMULC_VS_SENDAI_VIRUS_INFECTED_MOUSE_SPLENOCYTES_DN	184	Up	2.13545e-06	3.77579e-05	Up	1.55892e-05	0.00061513		1
138	GSE22432_CONVENTIONAL_CDC_VS_PLASMACYTOID_PDC_UP	186	Up	5.25719e-07	1.26261e-05	Up	1.58948e-05	0.000624605			1
168	GSE23505_IL6_IL1_VS_IL6_IL1_TGFB_TREATED_CD4_TCELL_DN	188	Up	3.35466e-07	8.89731e-06	Up	1.63676e-05	0.000640549				1
201	GSE30971_2H_VS_4H_LPS_STIM_MACROPHAGE_WBP7_HET_UP	168	Up	2.56037e-10	2.71627e-08	Up	1.71222e-05	0.000664632				1
17	GARY_CD5_TARGETS_DN	421	Up	4.12665e-08	1.72058e-06	Up	1.76063e-05	0.000680658				1
348	RAMALHO_STEMNESS_UP	200	Up	1.63583e-07	4.89204e-06	Up	1.79021e-05	0.000686536				1
11	CHANG_CORE_SERUM_RESPONSE_UP	204	Up	8.27177e-08	2.85122e-06	Up	1.94084e-05	0.000741324				1
8	BOYAULT_LIVER_CANCER_SUBCLASS_G3_UP	184	Up	9.73988e-10	7.43971e-08	Up	2.00517e-05	0.000762844				1
53	GSE15330_MEGAKARYOCYTE_ERYTHROID_PROGENITOR_VS_PRO_BCELL_DN	191	Up	1.13898e-06	2.31382e-05	Up	2.04903e-05	0.000776356			1
93	GSE17721_POLYIC_VS_CPG_16H_BMDC_DN	192	Up	4.24038e-06	6.20165e-05	Up	2.10127e-05	0.000786865				1
227	GSE37532_VISCERAL_ADIPOSE_TISSUE_VS_LN_DERIVED_PPARG_KO_TCONV_CD4_TCELL_UP	160	Up	2.43746e-08	1.11354e-06	Up	2.13813e-05	0.00079754			1
1	ACEVEDO_LIVER_TUMOR_VS_NORMAL_ADJACENT_TISSUE_UP	816	Up	1.13795e-07	3.67065e-06	Up	2.20407e-05	0.000815762			1
371	REACTOME_MRNA_SPLICING_MINOR_PATHWAY	40	Up	0.000251317	0.00165831	Up	2.24179e-05	0.000826521				1
12	CHIANG_LIVER_CANCER_SUBCLASS_UNANNOTATED_DN	186	Up	1.17099e-10	1.38033e-08	Up	2.34883e-05	0.000862652				1
270	GSE41867_NAIVE_VS_DAY8_LCMV_EFFECTOR_CD8_TCELL_UP	185	Up	3.42258e-07	9.0523e-06	Up	2.416e-05	0.000880548		1
25	GSE1112_OT1_VS_HY_CD8AB_THYMOCYTE_RTOC_CULTURE_DN	184	Up	3.07832e-08	1.36073e-06	Up	2.43362e-05	0.000881641			1
257	GSE41176_UNSTIM_VS_ANTI_IGM_STIM_BCELL_6H_UP	192	Up	6.13388e-18	8.36662e-15	Up	2.7262e-05	0.000972083				1
77	GSE17721_12H_VS_24H_CPG_BMDC_DN	193	Up	1.03641e-06	2.13729e-05	Up	2.73377e-05	0.000972083				1
199	GSE28726_NAIVE_VS_ACTIVATED_VA24NEG_NKTCELL_UP	193	Up	9.36028e-06	0.000118191	Up	2.71235e-05	0.000972083			1
330	MALONEY_RESPONSE_TO_17AAG_DN	79	Up	1.07011e-07	3.48718e-06	Up	2.80825e-05	0.000993184				1
16	ELVIDGE_HYPOXIA_DN	139	Up	2.45529e-05	0.000256489	Up	3.07977e-05	0.00106941				1
39	GSE14000_UNSTIM_VS_4H_LPS_DC_TRANSLATED_RNA_UP	180	Up	2.78586e-07	7.59981e-06	Up	3.18565e-05	0.00108742				1
250	GSE40274_CTRL_VS_FOXP3_AND_HELIOS_TRANSDUCED_ACTIVATED_CD4_TCELL_DN	186	Up	6.87589e-07	1.54473e-05	Up	3.1769e-05	0.00108742				1
389	SANA_RESPONSE_TO_IFNG_DN	83	Up	1.5078e-05	0.000173243	Up	3.16707e-05	0.00108742				1
188	GSE27786_CD8_TCELL_VS_NEUTROPHIL_UP	190	Up	8.40619e-05	0.000679038	Up	3.18858e-05	0.00108742			1
253	GSE40666_UNTREATED_VS_IFNA_STIM_EFFECTOR_CD8_TCELL_90MIN_DN	189	Up	1.92593e-11	3.06479e-09	Up	3.22872e-05	0.00109719		1
364	REACTOME_GLUCONEOGENESIS	31	Up	4.96703e-05	0.000447407	Up	3.3622e-05	0.0011385	1
261	GSE41867_DAY6_EFFECTOR_VS_DAY30_EXHAUSTED_CD8_TCELL_LCMV_CLONE13_DN	188	Up	1.82905e-05	0.000204016	Up	3.42756e-05	0.00115653			1
251	GSE40274_CTRL_VS_LEF1_TRANSDUCED_ACTIVATED_CD4_TCELL_DN	161	Up	1.93343e-05	0.000213169	Up	3.49714e-05	0.00117585				1
51	GSE15330_GRANULOCYTE_MONOCYTE_PROGENITOR_VS_PRO_BCELL_UP	184	Up	5.68443e-07	1.33682e-05	Up	3.58975e-05	0.00119437			1
397	SHAFFER_IRF4_TARGETS_IN_ACTIVATED_B_LYMPHOCYTE	77	Up	0.000186195	0.00129106	Up	3.58744e-05	0.00119437				1
55	GSE15330_WT_VS_IKAROS_KO_MEGAKARYOCYTE_ERYTHROID_PROGENITOR_UP	193	Up	7.02563e-05	0.000594687	Up	3.77532e-05	0.00124189			1
281	GSE46606_IRF4_KO_VS_WT_CD40L_IL2_IL5_1DAY_STIMULATED_BCELL_UP	180	Up	0.000123015	0.000925787	Up	3.7846e-05	0.00124189			1
297	GSE7764_IL15_NK_CELL_24H_VS_SPLENOCYTE_UP	183	Up	2.41939e-06	4.12506e-05	Up	3.82569e-05	0.00125108			1
288	GSE6090_UNSTIM_VS_DC_SIGN_STIM_DC_UP	159	Up	0.000264436	0.00172697	Up	3.98661e-05	0.00129925				1
387	RHEIN_ALL_GLUCOCORTICOID_THERAPY_DN	353	Up	3.26717e-10	3.31861e-08	Up	4.08419e-05	0.00132653				1
49	GSE14908_RESTING_VS_HDM_STIM_CD4_TCELL_ATOPIC_PATIENT_UP	191	Up	3.20713e-05	0.000313747	Up	4.14721e-05	0.00133789			1
319	KEGG_PROTEIN_EXPORT	23	Up	0.00175922	0.00776491	Up	4.1615e-05	0.00133799				1
225	GSE37532_TREG_VS_TCONV_PPARG_KO_CD4_TCELL_FROM_LN_DN	187	Up	1.80564e-05	0.000202113	Up	4.24952e-05	0.00136134			1
404	WAKABAYASHI_ADIPOGENESIS_PPARG_RXRA_BOUND_WITH_H4K20ME1_MARK	136	Up	3.29373e-05	0.000319924	Up	4.26267e-05	0.00136134				1
231	GSE39382_IL3_VS_IL3_IL33_TREATED_MAST_CELL_UP	196	Up	7.64596e-12	1.32734e-09	Up	4.35e-05	0.00138461			1
185	GSE2770_IL4_ACT_VS_ACT_CD4_TCELL_2H_UP	189	Up	3.16517e-08	1.39267e-06	Up	4.38625e-05	0.0013869				1
26	GSE11864_CSF1_VS_CSF1_IFNG_PAM3CYS_IN_MAC_UP	187	Up	3.18582e-08	1.39533e-06	Up	4.40666e-05	0.00138875				1
192	GSE27786_NKTCELL_VS_MONO_MAC_UP	193	Up	0.00109789	0.00535921	Up	4.42851e-05	0.00139105			1
65	GSE16386_IL4_VS_IL4_AND_ROSIGLITAZONE_STIM_MACROPHAGE_6H_UP	188	Up	6.75345e-05	0.000575731	Up	4.51738e-05	0.00141431				1
379	REACTOME_REGULATION_OF_ORNITHINE_DECARBOXYLASE_ODC	48	Up	0.00030259	0.0019146	Up	4.55386e-05	0.00142107	1
5	BILANGES_RAPAMYCIN_SENSITIVE_VIA_TSC1_AND_TSC2	72	Up	0.000159227	0.00113795	Up	4.62132e-05	0.00143743				1
6	BIOCARTA_PROTEASOME_PATHWAY	28	Up	0.000735956	0.00387585	Up	4.7408e-05	0.0014698				1
42	GSE14415_TCONV_VS_FOXP3_KO_INDUCED_TREG_UP	161	Up	2.33165e-06	4.01742e-05	Up	4.83019e-05	0.00149267			1
139	GSE22432_MULTIPOTENT_PROGENITOR_VS_CDC_DN	193	Up	7.41211e-06	9.72127e-05	Up	4.86508e-05	0.0014986			1
366	REACTOME_HOST_INTERACTIONS_OF_HIV_FACTORS	119	Up	0.000185784	0.00129009	Up	4.96648e-05	0.00152413				1
415	ZHANG_RESPONSE_TO_CANTHARIDIN_DN	67	Up	2.01987e-05	0.000220661	Up	5.00388e-05	0.00152658				1
98	GSE17721_POLYIC_VS_PAM3CSK4_16H_BMDC_DN	185	Up	1.65025e-06	3.1078e-05	Up	5.02283e-05	0.00152748				1
279	GSE45837_WT_VS_GFI1_KO_PDC_DN	199	Up	3.75561e-08	1.60083e-06	Up	5.09617e-05	0.00153998				1
179	GSE25088_CTRL_VS_IL4_AND_ROSIGLITAZONE_STIM_STAT6_KO_MACROPHAGE_UP	183	Up	4.70524e-06	6.75573e-05	Up	5.1151e-05	0.0015408				1
81	GSE17721_CTRL_VS_POLYIC_12H_BMDC_UP	190	Up	1.54015e-05	0.000175901	Up	5.25762e-05	0.00156402				1
375	REACTOME_PROCESSING_OF_CAPPED_INTRONLESS_PRE_MRNA	23	Up	0.000133697	0.000989563	Up	5.51968e-05	0.00163181				1
305	HORTON_SREBF_TARGETS	24	Up	2.55435e-06	4.2638e-05	Up	5.55181e-05	0.00163624				1
45	GSE14769_40MIN_VS_360MIN_LPS_BMDM_UP	187	Up	6.66728e-08	2.41133e-06	Up	5.67235e-05	0.00166662				1
33	GSE13547_WT_VS_ZFX_KO_BCELL_ANTI_IGM_STIM_2H_UP	172	Up	8.97622e-08	3.05e-06	Up	5.69438e-05	0.00166796			1
20	GROSS_HYPOXIA_VIA_HIF1A_UP	75	Up	3.14864e-05	0.000309514	Up	5.71979e-05	0.00167029				1
87	GSE17721_LPS_VS_PAM3CSK4_6H_BMDC_DN	195	Up	2.80681e-06	4.57328e-05	Up	6.04342e-05	0.00174875				1
107	GSE17974_CTRL_VS_ACT_IL4_AND_ANTI_IL12_4H_CD4_TCELL_DN	182	Up	3.88947e-05	0.000364442	Up	6.15449e-05	0.0017755				1
136	GSE22033_UNTREATED_VS_MRL24_TREATED_MEF_UP	192	Up	1.49018e-05	0.000172464	Up	6.34412e-05	0.00181377				1
129	GSE20727_CTRL_VS_ROS_INHIBITOR_TREATED_DC_UP	191	Up	2.47942e-06	4.19005e-05	Up	6.39139e-05	0.00181641				1
34	GSE14000_4H_VS_16H_LPS_DC_TRANSLATED_RNA_UP	185	Up	4.45347e-10	4.12832e-08	Up	6.60698e-05	0.00187211				1
68	GSE16755_CTRL_VS_IFNA_TREATED_MAC_DN	186	Down	0.00228469	0.00958025	Down	6.64417e-05	0.00187708		1
32	GSE13522_CTRL_VS_T_CRUZI_Y_STRAIN_INF_SKIN_IFNG_KO_UP	153	Up	1.77177e-05	0.000198555	Up	6.7375e-05	0.00189225				1
189	GSE27786_LIN_NEG_VS_MONO_MAC_UP	193	Up	0.000122388	0.000922305	Up	6.93855e-05	0.001943			1
64	GSE16266_CTRL_VS_HEATSHOCK_AND_LPS_STIM_MEF_UP	190	Up	7.60147e-06	9.9423e-05	Up	7.11076e-05	0.0019854				1
70	GSE1740_MCSF_VS_MCSF_AND_IFNG_DAY2_DERIVED_MACROPHAGE_DN	186	Up	3.8627e-05	0.000362328	Up	7.92905e-05	0.00215098				1
121	GSE18893_CTRL_VS_TNF_TREATED_TCONV_2H_DN	187	Up	0.000241541	0.00160713	Up	7.90554e-05	0.00215098				1
346	PENG_LEUCINE_DEPRIVATION_DN	183	Up	4.67026e-11	6.65547e-09	Up	8.10423e-05	0.00217397	1
119	GSE18791_UNSTIM_VS_NEWCATSLE_VIRUS_DC_10H_UP	185	Up	1.86247e-08	9.07874e-07	Up	8.1504e-05	0.00217397		1
309	IVANOVA_HEMATOPOIESIS_INTERMEDIATE_PROGENITOR	141	Up	4.84271e-08	1.93465e-06	Up	8.13797e-05	0.00217397				1
78	GSE17721_12H_VS_24H_LPS_BMDC_DN	190	Up	1.10087e-05	0.000134585	Up	8.11104e-05	0.00217397				1
69	GSE17301_CTRL_VS_48H_ACD3_ACD28_IFNA2_STIM_CD8_TCELL_UP	193	Up	2.54429e-07	7.10317e-06	Up	8.2777e-05	0.00219437		1
384	REACTOME_TRANSPORT_OF_MATURE_TRANSCRIPT_TO_CYTOPLASM	51	Up	0.00174372	0.00771861	Up	8.29581e-05	0.00219437				1
278	GSE45365_WT_VS_IFNAR_KO_CD8A_DC_UP	189	Up	1.31938e-07	4.17135e-06	Up	8.3442e-05	0.00219984		1
99	GSE1791_CTRL_VS_NEUROMEDINU_IN_T_CELL_LINE_12H_UP	183	Up	5.17959e-09	3.09092e-07	Up	8.4476e-05	0.00221003				1
269	GSE41867_NAIVE_VS_DAY30_LCMV_ARMSTRONG_MEMORY_CD8_TCELL_UP	191	Up	8.38824e-06	0.000108085	Up	8.48912e-05	0.00221483		1
353	REACTOME_AUTODEGRADATION_OF_THE_E3_UBIQUITIN_LIGASE_COP1	47	Up	0.00104232	0.00513543	Up	8.51804e-05	0.00221632				1
113	GSE18791_CTRL_VS_NEWCASTLE_VIRUS_DC_18H_DN	170	Down	0.00204901	0.00876523	Down	8.75307e-05	0.00226512		1
317	KEGG_N_GLYCAN_BIOSYNTHESIS	46	Up	0.000563358	0.00314927	Up	8.84533e-05	0.00228281	1
27	GSE11864_UNTREATED_VS_CSF1_IFNG_IN_MAC_DN	187	Up	0.000144125	0.00105287	Up	8.99028e-05	0.00228559				1
352	REACTOME_AUTODEGRADATION_OF_CDH1_BY_CDH1_APC_C	56	Up	0.000147913	0.00107071	Up	8.88106e-05	0.00228559				1
373	REACTOME_P53_INDEPENDENT_G1_S_DNA_DAMAGE_CHECKPOINT	48	Up	0.00134697	0.00631055	Up	9.02364e-05	0.00228559				1
304	GUTIERREZ_MULTIPLE_MYELOMA_UP	33	Up	6.52364e-05	0.000560141	Up	9.16249e-05	0.00231462				1
386	REACTOME_VIF_MEDIATED_DEGRADATION_OF_APOBEC3G	49	Up	0.00142188	0.006568	Up	9.53213e-05	0.00237656				1
80	GSE17721_CTRL_VS_LPS_8H_BMDC_UP	189	Up	1.73321e-07	5.12343e-06	Up	9.58237e-05	0.00238002				1
127	GSE20198_IL12_VS_IL12_IL18_TREATED_ACT_CD4_TCELL_UP	188	Up	0.000861388	0.00439741	Up	9.59587e-05	0.00238002				1
240	GSE3982_MAC_VS_CENT_MEMORY_CD4_TCELL_UP	191	Up	7.20601e-10	5.8806e-08	Up	9.86379e-05	0.00242602			1
74	GSE17721_0.5H_VS_8H_CPG_BMDC_UP	190	Up	1.05296e-09	7.91626e-08	Up	9.90835e-05	0.00242602				1
19	GRADE_COLON_AND_RECTAL_CANCER_UP	273	Up	3.81017e-07	9.85893e-06	Up	9.88669e-05	0.00242602				1
82	GSE17721_LPS_VS_CPG_1H_BMDC_UP	190	Up	6.68982e-06	8.98374e-05	Up	9.99387e-05	0.0024407				1
43	GSE1460_INTRATHYMIC_T_PROGENITOR_VS_NAIVE_CD4_TCELL_CORD_BLOOD_UP	194	Up	1.00929e-08	5.41389e-07	Up	0.000103634	0.00251602			1
103	GSE17974_1H_VS_72H_UNTREATED_IN_VITRO_CD4_TCELL_DN	186	Up	1.46392e-08	7.43485e-07	Up	0.000103813	0.00251602				1
167	GSE23321_CD8_STEM_CELL_MEMORY_VS_NAIVE_CD8_TCELL_UP	179	Up	4.98108e-05	0.00044825	Up	0.000103792	0.00251602			1
196	GSE28726_ACT_CD4_TCELL_VS_ACT_NKTCELL_UP	193	Up	1.46976e-05	0.000170514	Up	0.000104249	0.00252018			1
84	GSE17721_LPS_VS_GARDIQUIMOD_6H_BMDC_DN	189	Up	2.28544e-06	3.97232e-05	Up	0.000106064	0.00255759				1
132	GSE21670_UNTREATED_VS_IL6_TREATED_STAT3_KO_CD4_TCELL_DN	188	Up	4.33058e-05	0.000399501	Up	0.000108044	0.00259877				1
212	GSE35685_CD34POS_CD38NEG_VS_CD34POS_CD10NEG_CD62LPOS_BONE_MARROW_UP	198	Up	6.58042e-06	8.86176e-05	Up	0.000111204	0.00266136			1
226	GSE37532_TREG_VS_TCONV_PPARG_KO_CD4_TCELL_FROM_VISCERAL_ADIPOSE_TISSUE_UP	189	Up	0.000490791	0.00281862	Up	0.000111139	0.00266136			1
232	GSE3982_CENT_MEMORY_CD4_TCELL_VS_TH2_DN	190	Up	6.98302e-07	1.56145e-05	Up	0.000115073	0.00274708			1
85	GSE17721_LPS_VS_GARDIQUIMOD_8H_BMDC_DN	195	Up	7.15684e-06	9.47281e-05	Up	0.000124438	0.00293945				1
54	GSE15330_MEGAKARYOCYTE_ERYTHROID_VS_GRANULOCYTE_MONOCYTE_PROGENITOR_IKAROS_KO_UP	196	Up	2.75535e-06	4.52029e-05	Up	0.000130597	0.00304908			1
254	GSE41087_WT_VS_FOXP3_MUT_ANTI_CD3_CD28_STIM_CD4_TCELL_DN	194	Up	9.56829e-17	8.30527e-14	Up	0.000131241	0.00305663			1
209	GSE31082_DN_VS_CD8_SP_THYMOCYTE_UP	185	Up	1.86718e-08	9.07874e-07	Up	0.000132018	0.00306724			1
403	TONKS_TARGETS_OF_RUNX1_RUNX1T1_FUSION_MONOCYTE_UP	198	Up	3.82787e-06	5.76475e-05	Up	0.000132647	0.00307439				1
268	GSE41867_NAIVE_VS_DAY30_LCMV_ARMSTRONG_MEMORY_CD8_TCELL_DN	191	Up	6.77974e-06	9.07896e-05	Up	0.000133259	0.00308109		1
202	GSE30971_CTRL_VS_LPS_STIM_MACROPHAGE_WBP7_HET_2H_DN	183	Up	3.22074e-14	1.23007e-11	Up	0.000136208	0.00314167				1
276	GSE45365_CD8A_DC_VS_CD11B_DC_DN	184	Up	1.57598e-05	0.000179564	Up	0.000141289	0.00321998			1
342	OISHI_CHOLANGIOMA_STEM_CELL_LIKE_UP	327	Up	0.000187753	0.00129997	Up	0.000143645	0.00326586				1
170	GSE2405_HEAT_KILLED_VS_LIVE_A_PHAGOCYTOPHILUM_STIM_NEUTROPHIL_9H_UP	190	Up	5.46638e-06	7.59724e-05	Up	0.000148543	0.00335328				1
194	GSE27859_DC_VS_CD11C_INT_F480_HI_MACROPHAGE_UP	190	Up	1.73101e-05	0.000194673	Up	0.000149386	0.00336247			1
23	GSE10239_MEMORY_VS_KLRG1HIGH_EFF_CD8_TCELL_DN	191	Up	8.9613e-05	0.000714532	Up	0.000150387	0.003371			1
76	GSE17721_0.5H_VS_8H_POLYIC_BMDC_UP	191	Up	5.42938e-07	1.28635e-05	Up	0.000152166	0.00339494				1
322	KEGG_TERPENOID_BACKBONE_BIOSYNTHESIS	15	Up	0.000474494	0.00274242	Up	0.000155464	0.00346044	1
228	GSE37532_WT_VS_PPARG_KO_VISCERAL_ADIPOSE_TISSUE_TCONV_DN	189	Up	4.0245e-07	1.02743e-05	Up	0.000158816	0.00352682			1
29	GSE12845_NAIVE_VS_PRE_GC_TONSIL_BCELL_DN	195	Up	8.37722e-11	1.08089e-08	Up	0.000163908	0.00362306			1
320	KEGG_PYRUVATE_METABOLISM	39	Up	0.000492356	0.0028232	Up	0.00016385	0.00362306	1
323	KEGG_VALINE_LEUCINE_AND_ISOLEUCINE_BIOSYNTHESIS	11	Up	0.00180952	0.0079514	Up	0.000164695	0.00362745	1
120	GSE18791_UNSTIM_VS_NEWCATSLE_VIRUS_DC_18H_UP	187	Up	5.49932e-10	4.90724e-08	Up	0.000168706	0.00369489		1
146	GSE22589_HEALTHY_VS_HIV_INFECTED_DC_UP	186	Up	2.84698e-05	0.000285236	Up	0.000170032	0.0037154			1
73	GSE17721_0.5H_VS_12H_CPG_BMDC_UP	193	Up	1.4603e-07	4.46033e-06	Up	0.000171658	0.00374238				1
108	GSE18791_CTRL_VS_NEWCASTLE_VIRUS_DC_10H_DN	185	Down	0.000723708	0.00383035	Down	0.000172966	0.00375375		1
147	GSE22601_DOUBLE_POSITIVE_VS_CD8_SINGLE_POSITIVE_THYMOCYTE_DN	188	Up	2.41608e-05	0.000253326	Up	0.000174309	0.00377433			1
234	GSE3982_DC_VS_EFF_MEMORY_CD4_TCELL_UP	188	Up	9.95126e-09	5.36912e-07	Up	0.000177217	0.00382059			1
118	GSE18791_UNSTIM_VS_NEWCATSLE_VIRUS_DC_10H_DN	184	Down	0.00149934	0.00683	Down	0.000177246	0.00382059		1
338	MOREAUX_B_LYMPHOCYTE_MATURATION_BY_TACI_DN	68	Up	0.000111554	0.000854146	Up	0.000182308	0.00392085				1
86	GSE17721_LPS_VS_PAM3CSK4_12H_BMDC_DN	193	Up	3.80245e-07	9.85893e-06	Up	0.000184021	0.00394879				1
193	GSE27859_DC_VS_CD11C_INT_F480_HI_MACROPHAGE_DN	149	Up	1.59968e-05	0.000182047	Up	0.000184754	0.00395564			1
407	WEST_ADRENOCORTICAL_TUMOR_UP	286	Up	3.82212e-08	1.62194e-06	Up	0.000187021	0.00399523				1
28	GSE11924_TFH_VS_TH1_CD4_TCELL_DN	188	Up	6.68778e-05	0.000571665	Up	0.000192051	0.00408984			1
361	REACTOME_DESTABILIZATION_OF_MRNA_BY_AUF1_HNRNP_D0	50	Up	0.000439395	0.00259452	Up	0.000192307	0.00408984				1
35	GSE14000_TRANSLATED_RNA_VS_MRNA_4H_LPS_DC_UP	188	Up	1.46986e-06	2.85248e-05	Up	0.000194688	0.00413129				1
259	GSE41176_WT_VS_TAK1_KO_ANTI_IGM_STIM_BCELL_3H_DN	194	Up	3.67632e-06	5.60441e-05	Up	0.00020392	0.00430803			1
340	NAKAMURA_CANCER_MICROENVIRONMENT_DN	43	Up	0.00169992	0.00756684	Up	0.00020737	0.00436161				1
360	REACTOME_CROSS_PRESENTATION_OF_SOLUBLE_EXOGENOUS_ANTIGENS_ENDOSOMES	47	Up	0.000138337	0.00101525	Up	0.000209956	0.00440631				1
83	GSE17721_LPS_VS_CPG_8H_BMDC_DN	193	Up	7.06374e-07	1.57581e-05	Up	0.000216827	0.00450112				1
311	KAAB_FAILED_HEART_ATRIUM_DN	137	Up	0.000126517	0.000943737	Up	0.00021683	0.00450112				1
266	GSE41867_NAIVE_VS_DAY15_LCMV_ARMSTRONG_EFFECTOR_CD8_TCELL_UP	196	Up	0.000754935	0.00394749	Up	0.000217873	0.00451295		1
100	GSE1791_CTRL_VS_NEUROMEDINU_IN_T_CELL_LINE_6H_DN	186	Up	5.6703e-08	2.13992e-06	Up	0.00022139	0.00454634				1
92	GSE17721_PAM3CSK4_VS_GADIQUIMOD_8H_BMDC_UP	191	Up	3.32011e-06	5.19679e-05	Up	0.000227874	0.00462971				1
347	RAHMAN_TP53_TARGETS_PHOSPHORYLATED	21	Up	1.76442e-05	0.000197963	Up	0.000229559	0.00465405				1
15	DING_LUNG_CANCER_EXPRESSION_BY_COPY_NUMBER	99	Up	0.00162286	0.00728493	Up	0.000230386	0.0046543				1
399	SHIPP_DLBCL_VS_FOLLICULAR_LYMPHOMA_UP	44	Up	0.000593246	0.00329129	Up	0.000231889	0.00467154			1
89	GSE17721_LPS_VS_POLYIC_16H_BMDC_UP	191	Up	3.6005e-06	5.50067e-05	Up	0.000235641	0.00472649				1
301	GSE9650_GP33_VS_GP276_LCMV_SPECIFIC_EXHAUSTED_CD8_TCELL_DN	192	Up	9.31547e-06	0.000117807	Up	0.000243941	0.0048529				1
47	GSE14908_ATOPIC_VS_NONATOPIC_PATIENT_HDM_STIM_CD4_TCELL_UP	189	Up	2.52357e-06	4.23666e-05	Up	0.000249431	0.00494154			1
333	MILI_PSEUDOPODIA_HAPTOTAXIS_UP	495	Up	2.44328e-06	4.15097e-05	Up	0.000251266	0.00496758				1
277	GSE45365_NK_CELL_VS_CD8_TCELL_MCMV_INFECTION_UP	192	Up	3.06886e-13	7.5132e-11	Up	0.000253496	0.00499099			1
300	GSE9509_10MIN_VS_30MIN_LPS_AND_IL10_STIM_IL10_KO_MACROPHAGE_UP	167	Up	1.46032e-05	0.000169624	Up	0.000255257	0.00501532				1
229	GSE37534_PIOGLITAZONE_VS_ROSIGLITAZONE_TREATED_CD4_TCELL_PPARG1_FOXP3_TRANSDUCED_UP	165	Up	0.000128805	0.000958556	Up	0.000263667	0.00513828				1
124	GSE19825_NAIVE_VS_DAY3_EFF_CD8_TCELL_DN	183	Up	1.40881e-08	7.26324e-07	Up	0.000265117	0.00515602			1
90	GSE17721_PAM3CSK4_VS_CPG_6H_BMDC_UP	193	Up	1.16909e-06	2.35496e-05	Up	0.000281848	0.00544811				1
390	SCHLOSSER_MYC_AND_SERUM_RESPONSE_SYNERGY	32	Up	0.00197656	0.00853558	Up	0.000289248	0.0055686				1
125	GSE19888_CTRL_VS_A3R_INHIBITOR_TREATED_MAST_CELL_UP	189	Up	1.39133e-08	7.21978e-07	Up	0.000290214	0.00557573				1
40	GSE14000_UNSTIM_VS_4H_LPS_DC_UP	180	Up	1.42118e-06	2.76927e-05	Up	0.00029137	0.00557573				1
398	SHEN_SMARCA2_TARGETS_UP	415	Up	6.14382e-07	1.42382e-05	Up	0.000297455	0.0056782				1
308	IVANOVA_HEMATOPOIESIS_EARLY_PROGENITOR	499	Up	9.05988e-05	0.000720264	Up	0.000298508	0.0056782				1
377	REACTOME_PURINE_RIBONUCLEOSIDE_MONOPHOSPHATE_BIOSYNTHESIS	11	Up	0.00021969	0.0014838	Up	0.000316257	0.00598007	1
356	REACTOME_CDK_MEDIATED_PHOSPHORYLATION_AND_REMOVAL_OF_CDC6	46	Up	0.000814702	0.00419793	Up	0.000318645	0.00601332				1
97	GSE17721_POLYIC_VS_PAM3CSK4_12H_BMDC_DN	190	Up	6.04753e-07	1.40834e-05	Up	0.000324653	0.00610258				1
400	STEIN_ESRRA_TARGETS	505	Up	3.71072e-06	5.61699e-05	Up	0.000326092	0.00611758				1
284	GSE5503_LIVER_DC_VS_PLN_DC_ACTIVATED_ALLOGENIC_TCELL_DN	194	Up	0.0006912	0.00370763	Up	0.000331994	0.00619182			1
260	GSE41867_DAY15_EFFECTOR_VS_DAY30_EXHAUSTED_CD8_TCELL_LCMV_CLONE13_DN	190	Up	0.000134566	0.000993491	Up	0.000333175	0.00620173			1
75	GSE17721_0.5H_VS_8H_GARDIQUIMOD_BMDC_UP	187	Up	6.70402e-07	1.52769e-05	Up	0.000334113	0.00620709				1
316	KEGG_LYSINE_DEGRADATION	44	Up	5.276e-06	7.4136e-05	Up	0.000336764	0.0062321	1
216	GSE36826_NORMAL_VS_STAPH_AUREUS_INF_IL1R_KO_SKIN_DN	187	Up	3.55917e-10	3.56951e-08	Up	0.000338502	0.00624278				1
351	REACTOME_ASPARAGINE_N_LINKED_GLYCOSYLATION	80	Up	1.62015e-06	3.07539e-05	Up	0.000339926	0.00625425	1
256	GSE41176_UNSTIM_VS_ANTI_IGM_STIM_BCELL_3H_DN	190	Up	2.76864e-07	7.57449e-06	Up	0.000343177	0.00627777				1
190	GSE27786_LSK_VS_CD4_TCELL_UP	189	Up	2.87307e-07	7.79321e-06	Up	0.000342851	0.00627777			1
126	GSE20152_SPHK1_KO_VS_WT_HTNFA_OVERXPRESS_ANKLE_DN	184	Up	3.23188e-09	2.03013e-07	Up	0.000345994	0.00630515			1
211	GSE33292_DN3_THYMOCYTE_VS_TCELL_LYMPHOMA_FROM_TCF1_KO_UP	164	Up	0.000205908	0.00140529	Up	0.000347092	0.0063131			1
362	REACTOME_ER_PHAGOSOME_PATHWAY	58	Up	0.00213921	0.00907784	Up	0.000354342	0.00640836				1
207	GSE30971_WBP7_HET_VS_KO_MACROPHAGE_DN	185	Up	0.00162958	0.00730825	Down	0.000356052	0.00642711			1
249	GSE40273_GATA1_KO_VS_WT_TREG_UP	188	Up	8.08085e-07	1.74561e-05	Up	0.000359417	0.00646561			1
280	GSE46468_LUNG_INNATE_LYMPHOID_CELL_VS_SPLEEN_CD4_TCELL_DN	190	Up	0.000413773	0.00246887	Up	0.000360805	0.00647618			1
299	GSE9006_HEALTHY_VS_TYPE_2_DIABETES_PBMC_AT_DX_UP	188	Up	9.10383e-07	1.91884e-05	Up	0.000369837	0.00660107			1
285	GSE5542_IFNG_VS_IFNA_TREATED_EPITHELIAL_CELLS_6H_UP	189	Up	1.8922e-08	9.07874e-07	Up	0.000373148	0.00664746		1
298	GSE7764_IL15_TREATED_VS_CTRL_NK_CELL_24H_UP	186	Up	2.52835e-06	4.23666e-05	Up	0.000376188	0.006677				1
325	KIM_MYC_AMPLIFICATION_TARGETS_UP	194	Up	0.0001619	0.00115387	Up	0.000381123	0.00675203				1
13	DEN_INTERACT_WITH_LCA5	26	Up	0.000635556	0.00347355	Up	0.000389132	0.00686843				1
233	GSE3982_DC_VS_CENT_MEMORY_CD4_TCELL_UP	196	Up	6.64815e-08	2.41133e-06	Up	0.0003922	0.00690981			1
131	GSE21546_WT_VS_ELK1_KO_ANTI_CD3_STIM_DP_THYMOCYTES_DN	180	Up	4.88504e-06	6.95117e-05	Up	0.000394006	0.00692884			1
4	APPIERTO_RESPONSE_TO_FENRETINIDE_DN	50	Up	8.96533e-05	0.000714532	Up	0.000396242	0.0069483				1
349	REACTOME_ANTIGEN_PROCESSING_CROSS_PRESENTATION	72	Up	0.000404701	0.00242719	Up	0.000417796	0.00727283				1
63	GSE15930_NAIVE_VS_72H_IN_VITRO_STIM_TRICHOSTATINA_CD8_TCELL_DN	193	Up	5.37175e-08	2.06812e-06	Up	0.000424109	0.00731937				1
72	GSE1740_UNSTIM_VS_IFNA_STIMULATED_MCSF_IFNG_DERIVED_MACROPHAGE_DN	183	Up	6.34824e-07	1.46055e-05	Up	0.000424777	0.00731937		1
96	GSE17721_POLYIC_VS_GARDIQUIMOD_6H_BMDC_DN	193	Up	2.28093e-06	3.97232e-05	Up	0.000425411	0.00731937				1
213	GSE36392_EOSINOPHIL_VS_NEUTROPHIL_IL25_TREATED_LUNG_DN	191	Up	3.39289e-05	0.000327489	Up	0.000424913	0.00731937			1
286	GSE5589_LPS_AND_IL10_VS_LPS_AND_IL6_STIM_IL6_KO_MACROPHAGE_45MIN_DN	191	Up	1.15711e-05	0.00014074	Up	0.000426717	0.00732863				1
217	GSE36826_NORMAL_VS_STAPH_AUREUS_INF_SKIN_DN	195	Up	2.9477e-10	3.0263e-08	Up	0.000429258	0.00734584				1
359	REACTOME_CLEAVAGE_OF_GROWING_TRANSCRIPT_IN_THE_TERMINATION_REGION_	42	Up	0.000197536	0.00135884	Up	0.000432858	0.00739421				1
307	HU_ANGIOGENESIS_DN	37	Up	0.00171183	0.00760566	Up	0.000438983	0.00748545				1
414	ZHAN_MULTIPLE_MYELOMA_SUBGROUPS	30	Up	0.000165474	0.00117207	Up	0.000440037	0.00749003				1
203	GSE30971_CTRL_VS_LPS_STIM_MACROPHAGE_WBP7_HET_4H_DN	187	Up	3.55483e-20	1.69708e-16	Up	0.000442802	0.00749702				1
341	NGO_MALIGNANT_GLIOMA_1P_LOH	16	Up	2.09866e-07	5.98151e-06	Up	0.00044255	0.00749702				1
372	REACTOME_P53_DEPENDENT_G1_DNA_DAMAGE_RESPONSE	53	Up	0.00159993	0.00720235	Up	0.000441508	0.00749702				1
350	REACTOME_APC_C_CDH1_MEDIATED_DEGRADATION_OF_CDC20_AND_OTHER_APC_C_CDH1_TARGETED_PROTEINS_IN_LATE_MITOSIS_EARLY_G1	64	Up	4.37379e-05	0.000402709	Up	0.000447181	0.00755775				1
321	KEGG_STEROID_BIOSYNTHESIS	16	Up	0.000705701	0.00376439	Up	0.000448605	0.00756842	1
137	GSE22432_CDC_VS_COMMON_DC_PROGENITOR_DN	191	Up	9.41464e-08	3.16038e-06	Up	0.000450583	0.00758839			1
306	HSIAO_HOUSEKEEPING_GENES	388	Up	0.000212769	0.00144695	Up	0.000451508	0.00759059				1
283	GSE4748_CTRL_VS_CYANOBACTERIUM_LPSLIKE_STIM_DC_3H_DN	194	Up	1.86852e-07	5.42268e-06	Up	0.000466423	0.00781381				1
41	GSE14308_TH2_VS_NAIVE_CD4_TCELL_UP	185	Up	0.000148874	0.00107441	Up	0.000469224	0.00783642			1
191	GSE27786_LSK_VS_MONO_MAC_UP	182	Up	3.1443e-05	0.000309503	Up	0.000470511	0.00784103			1
376	REACTOME_PROCESSING_OF_INTRONLESS_PRE_MRNAS	14	Up	0.000571515	0.00318553	Up	0.000471674	0.00784671				1
328	LANDIS_ERBB2_BREAST_PRENEOPLASTIC_DN	53	Up	0.0011131	0.0054127	Up	0.000474008	0.00787183				1
282	GSE46606_UNSTIM_VS_CD40L_IL2_IL5_1DAY_STIMULATED_IRF4_KO_BCELL_UP	191	Up	9.16383e-06	0.000116043	Up	0.000481332	0.00796296				1
294	GSE7509_DC_VS_MONOCYTE_WITH_FCGRIIB_STIM_UP	193	Up	7.16315e-06	9.47281e-05	Up	0.000489077	0.00805207			1
175	GSE24634_NAIVE_CD4_TCELL_VS_DAY3_IL4_CONV_TREG_DN	191	Up	8.79402e-08	2.99876e-06	Up	0.00050124	0.00819579			1
198	GSE28726_NAIVE_VS_ACTIVATED_CD4_TCELL_DN	196	Up	7.63293e-08	2.70927e-06	Up	0.000511321	0.0083179				1
310	JIANG_HYPOXIA_CANCER	79	Up	0.000498383	0.00284944	Up	0.000519888	0.00842854				1
24	GSE10240_IL22_VS_IL17_STIM_PRIMARY_BRONCHIAL_EPITHELIAL_CELLS_UP	192	Up	1.38866e-05	0.00016243	Up	0.000521927	0.00844726				1
106	GSE17974_CTRL_VS_ACT_IL4_AND_ANTI_IL12_48H_CD4_TCELL_DN	191	Up	1.7581e-07	5.16503e-06	Up	0.000534725	0.00862515				1
2	ACOSTA_PROLIFERATION_INDEPENDENT_MYC_TARGETS_UP	78	Up	0.00172384	0.00764125	Up	0.000551969	0.00888829				1
388	RUTELLA_RESPONSE_TO_HGF_DN	230	Up	0.000572722	0.0031904	Down	0.000570826	0.00913386				1
245	GSE3982_MEMORY_CD4_TCELL_VS_TH2_DN	189	Up	1.03944e-10	1.32327e-08	Up	0.000572085	0.00913519			1
315	KEGG_LIMONENE_AND_PINENE_DEGRADATION	10	Up	0.00139169	0.0064661	Up	0.000574267	0.00915472	1
94	GSE17721_POLYIC_VS_CPG_24H_BMDC_DN	192	Up	0.00163127	0.00731236	Up	0.00059646	0.00947686				1
52	GSE15330_HSC_VS_PRO_BCELL_UP	191	Up	0.000282117	0.00181758	Up	0.000605541	0.00960517			1
169	GSE24026_PD1_LIGATION_VS_CTRL_IN_ACT_TCELL_LINE_DN	192	Up	0.00135305	0.00632971	Up	0.000606785	0.00960893				1
396	SEIDEN_MET_SIGNALING	19	Up	1.51628e-05	0.000173745	Up	0.000613494	0.0096991				1
248	GSE39820_CTRL_VS_TGFBETA3_IL6_CD4_TCELL_UP	192	Up	0.000200686	0.00137753	Up	0.000625211	0.00986799				1
								SUM	32	31	132	220
						N =	415	%	0.0771084	0.0746988	0.318072	0.53012

## Sheet: Table S10
Supplemental Table 10: CAMERA gene set enrichment (RSTR vs. LTBI), MSigDB C5 collection (GO terms)
	GSEA_category	NGenes	Ug_direction	Ug_PValue	Ug_FDR	SA_direction	SA_PValue	SA_FDR	Central Carbon Metabolism	Nucleoside Metabolism	RNA metabolism	Ribosome/protein synthesis	Other
22	GO_MITOCHONDRIAL_MEMBRANE_PART	160	Up	1.73654e-11	1.71194e-08	Up	6.90234e-15	8.16409e-12	1
24	GO_MITOCHONDRIAL_RESPIRATORY_CHAIN_COMPLEX_I_BIOGENESIS	51	Up	4.89634e-11	3.21798e-08	Up	2.73588e-14	2.69666e-11	1
23	GO_MITOCHONDRIAL_RESPIRATORY_CHAIN_COMPLEX_ASSEMBLY	63	Up	5.5404e-10	2.73096e-07	Up	1.53749e-13	1.13659e-10	1
41	GO_OXIDOREDUCTASE_ACTIVITY_ACTING_ON_NAD_P_H_QUINONE_OR_SIMILAR_COMPOUND_AS_ACCEPTOR	52	Up	1.2368e-08	3.85036e-06	Up	1.55878e-12	8.38059e-10	1
31	GO_NADH_DEHYDROGENASE_COMPLEX	42	Up	1.05128e-11	1.46061e-08	Up	1.9458e-12	8.85191e-10	1
63	GO_TRNA_METABOLIC_PROCESS	167	Up	3.1277e-06	0.000276125	Up	1.92269e-12	8.85191e-10			1
3	GO_AMINO_ACID_ACTIVATION	51	Up	0.000173812	0.00461029	Up	8.36892e-12	3.53527e-09				1
25	GO_MITOCHONDRIAL_TRANSLATION	105	Up	6.14179e-07	9.61565e-05	Up	6.11889e-11	2.12865e-08	1
43	GO_OXIDOREDUCTASE_COMPLEX	92	Up	1.29785e-09	5.51469e-07	Up	1.53112e-10	4.76582e-08	1
62	GO_TRANSLATIONAL_TERMINATION	92	Up	2.97431e-06	0.000270662	Up	1.71854e-10	5.08171e-08				1
40	GO_OXIDOREDUCTASE_ACTIVITY_ACTING_ON_NAD_P_H	91	Up	1.77262e-06	0.000180776	Up	7.40855e-10	2.08639e-07	1
39	GO_ORGANELLAR_RIBOSOME	68	Up	4.24466e-05	0.00185979	Up	1.09913e-09	2.95467e-07				1
61	GO_TRANSLATIONAL_ELONGATION	110	Up	0.000281353	0.00637685	Up	1.42187e-09	3.65606e-07				1
45	GO_PRERIBOSOME	59	Up	6.18565e-07	9.61565e-05	Up	1.62863e-08	3.21056e-06				1
26	GO_MITOCHONDRIAL_TRANSMEMBRANE_TRANSPORT	53	Up	1.63619e-06	0.000180776	Up	1.59132e-08	3.21056e-06	1
54	GO_RIBONUCLEOPROTEIN_COMPLEX_BIOGENESIS	421	Up	0.000433265	0.00818773	Up	3.14322e-08	5.63302e-06					1
64	GO_TRNA_PROCESSING	107	Up	2.63512e-05	0.00130981	Up	6.77243e-08	1.11256e-05			1
20	GO_METAL_CLUSTER_BINDING	61	Up	0.000417899	0.00798041	Up	1.61597e-07	2.3892e-05					1
2	GO_AEROBIC_RESPIRATION	50	Up	4.11465e-06	0.000328894	Up	2.22432e-07	3.05921e-05	1
6	GO_CELLULAR_AMINO_ACID_METABOLIC_PROCESS	320	Up	9.54708e-05	0.00320858	Up	2.46555e-07	3.31393e-05	1
28	GO_MITOCHONDRION_ORGANIZATION	555	Up	3.93213e-06	0.000323035	Up	2.82004e-07	3.62559e-05	1
9	GO_COENZYME_BINDING	174	Up	1.37984e-06	0.000163235	Up	3.33114e-07	4.10424e-05					1
21	GO_MITOCHONDRIAL_ATP_SYNTHESIS_COUPLED_PROTON_TRANSPORT	17	Up	2.26143e-05	0.00118375	Up	4.58026e-07	5.31131e-05	1
8	GO_CELLULAR_PROTEIN_COMPLEX_DISASSEMBLY	121	Up	8.64719e-06	0.00054998	Up	6.22645e-07	6.94778e-05					1
17	GO_GLYCOSYL_COMPOUND_BIOSYNTHETIC_PROCESS	112	Up	1.42194e-07	3.36432e-05	Up	7.70673e-07	7.99607e-05					1
13	GO_COFACTOR_METABOLIC_PROCESS	321	Up	4.74291e-07	8.50131e-05	Up	1.02812e-06	0.000103056					1
58	GO_SMALL_SUBUNIT_PROCESSOME	33	Up	1.66163e-05	0.000927219	Up	1.14943e-06	0.000113296				1
18	GO_HYDROGEN_TRANSPORT	131	Up	4.01247e-05	0.00178255	Up	1.20483e-06	0.000116809	1
50	GO_PURINE_NUCLEOSIDE_BIOSYNTHETIC_PROCESS	83	Up	5.32306e-07	9.26055e-05	Up	1.54614e-06	0.00014674		1
55	GO_RIBONUCLEOSIDE_TRIPHOSPHATE_BIOSYNTHETIC_PROCESS	45	Up	1.21443e-05	0.000732994	Up	2.10698e-06	0.00018598		1
11	GO_COENZYME_METABOLIC_PROCESS	252	Up	6.33999e-07	9.61565e-05	Up	2.44149e-06	0.000203366					1
4	GO_ASPARTATE_FAMILY_AMINO_ACID_METABOLIC_PROCESS	52	Up	1.09892e-05	0.000677093	Up	3.85706e-06	0.000312474					1
48	GO_PROTON_TRANSPORTING_ATP_SYNTHASE_COMPLEX	22	Up	4.06922e-06	0.000328894	Up	5.65414e-06	0.000444643	1
49	GO_PROTON_TRANSPORTING_TWO_SECTOR_ATPASE_COMPLEX	47	Up	0.000110132	0.0035317	Up	5.71404e-06	0.000444643	1
33	GO_NUCLEOLAR_PART	60	Up	9.13747e-06	0.00057498	Up	7.40988e-06	0.000547775					1
15	GO_ENERGY_COUPLED_PROTON_TRANSPORT_DOWN_ELECTROCHEMICAL_GRADIENT	23	Up	0.000253601	0.00592904	Up	8.11522e-06	0.000582607	1
51	GO_PURINE_NUCLEOSIDE_MONOPHOSPHATE_BIOSYNTHETIC_PROCESS	58	Up	6.56189e-06	0.000446133	Up	9.5722e-06	0.000673928		1
36	GO_NUCLEOSIDE_TRIPHOSPHATE_BIOSYNTHETIC_PROCESS	57	Up	0.000124007	0.00382879	Up	1.17286e-05	0.000788212		1
53	GO_RIBONUCLEOPROTEIN_COMPLEX	686	Up	0.000144371	0.00406996	Up	1.24886e-05	0.000829861					1
37	GO_OLIGOSACCHARIDE_LIPID_INTERMEDIATE_BIOSYNTHETIC_PROCESS	20	Up	0.000110459	0.0035317	Up	1.43268e-05	0.000920967	1
42	GO_OXIDOREDUCTASE_ACTIVITY_ACTING_ON_THE_CH_CH_GROUP_OF_DONORS	56	Up	1.57739e-07	3.44504e-05	Up	1.6335e-05	0.00101522	1
12	GO_COFACTOR_BIOSYNTHETIC_PROCESS	156	Up	1.88527e-05	0.00101376	Up	1.79259e-05	0.00107085					1
27	GO_MITOCHONDRIAL_TRANSPORT	163	Up	9.40326e-06	0.000585476	Up	1.97164e-05	0.00115619	1
47	GO_PROTEIN_TARGETING_TO_MITOCHONDRION	47	Up	3.65511e-05	0.00168906	Up	1.97456e-05	0.00115619	1
30	GO_NAD_BINDING	53	Up	3.03665e-06	0.000272148	Up	2.69134e-05	0.00153044					1
56	GO_RIBOSOMAL_SMALL_SUBUNIT_BIOGENESIS	56	Up	0.000360926	0.00734751	Up	3.44213e-05	0.00183394				1
5	GO_ATP_BIOSYNTHETIC_PROCESS	32	Up	8.24524e-05	0.0029204	Up	3.51238e-05	0.00184005	1
35	GO_NUCLEOSIDE_MONOPHOSPHATE_BIOSYNTHETIC_PROCESS	79	Up	2.89087e-06	0.000267179	Up	4.04273e-05	0.00200913		1
1	GO_90S_PRERIBOSOME	23	Up	6.66116e-06	0.000447736	Up	5.00998e-05	0.00231477				1
19	GO_MATURATION_OF_SSU_RRNA	41	Up	0.000246361	0.00580569	Up	4.97613e-05	0.00231477				1
38	GO_ORGANELLAR_LARGE_RIBOSOMAL_SUBUNIT	31	Up	0.000576305	0.00999661	Up	5.34014e-05	0.00241081				1
46	GO_PROTEASOME_COMPLEX	76	Up	0.000564966	0.00991624	Up	5.72258e-05	0.00253426					1
10	GO_COENZYME_BIOSYNTHETIC_PROCESS	117	Up	3.19562e-05	0.00154935	Up	5.82856e-05	0.00255334					1
34	GO_NUCLEOSIDE_BISPHOSPHATE_METABOLIC_PROCESS	37	Up	0.000401093	0.00789744	Up	6.73322e-05	0.00288553		1
32	GO_NUCLEAR_PORE	73	Up	0.000299845	0.00663735	Up	7.2278e-05	0.00301354					1
59	GO_SNORNA_BINDING	25	Up	8.74438e-05	0.00300715	Up	7.95104e-05	0.00326545					1
44	GO_OXIDOREDUCTION_COENZYME_METABOLIC_PROCESS	99	Up	1.24973e-06	0.000150861	Up	8.13515e-05	0.00331802	1
16	GO_FATTY_ACYL_COA_BINDING	31	Up	0.000106794	0.00348999	Up	0.000186019	0.00666738	1
60	GO_STEROL_BIOSYNTHETIC_PROCESS	42	Up	2.51812e-05	0.00127305	Up	0.000228298	0.00771517	1
57	GO_RNA_PHOSPHODIESTER_BOND_HYDROLYSIS	109	Up	5.06142e-06	0.000374228	Up	0.000244009	0.00810713			1
7	GO_CELLULAR_PROTEIN_COMPLEX_ASSEMBLY	321	Up	9.89033e-05	0.0032876	Up	0.0002594	0.00838301					1
29	GO_MYELIN_SHEATH	165	Up	8.53472e-06	0.000548727	Up	0.000293734	0.00922686					1
52	GO_RAN_GTPASE_BINDING	31	Up	0.000229075	0.00559547	Up	0.000295797	0.00922686					1
14	GO_DNA_TEMPLATED_TRANSCRIPTION_TERMINATION	98	Up	0.000163147	0.00447509	Up	0.000313472	0.00960555					1
							Totals	64	25	6	3	10	20
							%	1	0.390625	0.09375	0.046875	0.15625	0.3125

## Sheet: Table S11
Supplemental Table 11: CAMERA gene set enrichment (RSTR vs. LTBI) in Uganda monocytes , Xue macrophage activation modules
	category	Direction	PValue	FDR	totalGenes	genesUpInRSTR	proportionUp
28	Xue2014_set28	Up	1.77183e-09	6.38077e-08	46	35	0.761
42	Xue2014_set42	Up	2.6044e-09	6.38077e-08	143	100	0.699
26	Xue2014_set26	Up	5.15573e-09	8.42103e-08	173	123	0.711
2	Xue2014_set02	Up	1.94178e-08	2.37868e-07	69	48	0.696
47	Xue2014_set47	Up	3.59664e-08	3.52471e-07	147	96	0.653
24	Xue2014_set24	Up	5.776e-08	4.71707e-07	740	475	0.642
6	Xue2014_set06	Up	2.06236e-07	1.44365e-06	115	81	0.704
13	Xue2014_set13	Up	3.02124e-07	1.85051e-06	357	233	0.653
43	Xue2014_set43	Up	9.53537e-07	5.19148e-06	131	89	0.679
22	Xue2014_set22	Up	4.32547e-06	2.11948e-05	93	65	0.699
41	Xue2014_set41	Up	7.393e-06	3.29325e-05	54	38	0.704
1	Xue2014_set01	Up	8.66133e-06	3.53671e-05	93	61	0.656
19	Xue2014_set19	Up	1.29771e-05	4.89138e-05	127	79	0.622
27	Xue2014_set27	Up	1.52225e-05	5.32787e-05	30	22	0.733
3	Xue2014_set03	Up	1.76377e-05	5.76165e-05	466	268	0.575
5	Xue2014_set05	Up	2.30922e-05	7.072e-05	99	63	0.636
34	Xue2014_set34	Up	2.66954e-05	7.69455e-05	179	105	0.587
23	Xue2014_set23	Up	3.01033e-05	7.91688e-05	584	326	0.558
25	Xue2014_set25	Up	3.06981e-05	7.91688e-05	96	62	0.646
12	Xue2014_set12	Up	3.46857e-05	8.498e-05	93	61	0.656
32	Xue2014_set32	Up	5.21473e-05	0.000121677	343	191	0.557
14	Xue2014_set14	Up	7.96369e-05	0.000171738	65	42	0.646
38	Xue2014_set38	Up	8.06117e-05	0.000171738	635	363	0.572
30	Xue2014_set30	Up	9.02463e-05	0.000184253	280	167	0.596
18	Xue2014_set18	Up	9.71632e-05	0.00019044	179	106	0.592
37	Xue2014_set37	Up	0.000105767	0.00019933	128	80	0.625
48	Xue2014_set48	Up	0.0001439	0.000261153	236	143	0.606
4	Xue2014_set04	Up	0.000194514	0.000331959	61	39	0.639
36	Xue2014_set36	Up	0.000196465	0.000331959	63	40	0.635
44	Xue2014_set44	Up	0.000214165	0.000349803	67	45	0.672
20	Xue2014_set20	Up	0.000273616	0.000432489	39	27	0.692
45	Xue2014_set45	Up	0.000481938	0.000737968	427	225	0.527
46	Xue2014_set46	Up	0.000507985	0.00075428	150	84	0.56
39	Xue2014_set39	Up	0.000731844	0.00105472	125	69	0.552
40	Xue2014_set40	Up	0.00102684	0.00143757	125	72	0.576
35	Xue2014_set35	Up	0.00672246	0.00915001	70	38	0.543
33	Xue2014_set33	Up	0.016539	0.0219029	69	39	0.565
9	Xue2014_set09	Up	0.0315092	0.0406303	75	34	0.453
16	Xue2014_set16	Up	0.0388862	0.0476356	59	33	0.559
49	Xue2014_set49	Up	0.0382579	0.0476356	20	12	0.6
15	Xue2014_set15	Up	0.0723506	0.0864678	91	48	0.527
7	Xue2014_set07	Down	0.106787	0.124585	70	14	0.2
31	Xue2014_set31	Up	0.123073	0.140246	79	34	0.43
10	Xue2014_set10	Up	0.154736	0.17232	121	59	0.488
8	Xue2014_set08	Down	0.180457	0.196498	87	17	0.195
11	Xue2014_set11	Up	0.332779	0.352792	154	73	0.474
17	Xue2014_set17	Up	0.338392	0.352792	49	20	0.408
21	Xue2014_set21	Up	0.768935	0.784954	83	33	0.398
29	Xue2014_set29	Up	0.810295	0.810295	33	14	0.424

## Sheet: Table S12
Supplemental Table 12: CAMERA gene set enrichment (RSTR vs. LTBI) in South Africa monocytes, Xue macrophage activation modules
	category	Direction	PValue	FDR	totalGenes	genesUpInRSTR	proportionUp
26	Xue2014_set26	Up	7.09284e-08	3.47549e-06	173	125	0.723
27	Xue2014_set27	Up	2.1973e-07	5.38338e-06	30	24	0.8
6	Xue2014_set06	Up	5.50702e-07	8.9948e-06	115	84	0.73
24	Xue2014_set24	Up	5.61491e-06	6.87826e-05	740	476	0.643
25	Xue2014_set25	Up	0.00010787	0.00105713	96	70	0.729
2	Xue2014_set02	Up	0.000440404	0.00308283	69	42	0.609
10	Xue2014_set10	Up	0.000429509	0.00308283	121	84	0.694
13	Xue2014_set13	Up	0.00100843	0.00617663	357	206	0.577
19	Xue2014_set19	Up	0.00151602	0.00825388	127	86	0.677
9	Xue2014_set09	Up	0.00213094	0.0104416	75	45	0.6
23	Xue2014_set23	Up	0.00385053	0.0171523	584	336	0.575
17	Xue2014_set17	Up	0.00447582	0.0182763	49	33	0.673
1	Xue2014_set01	Up	0.00573099	0.0200011	93	59	0.634
5	Xue2014_set05	Up	0.0061228	0.0200011	99	63	0.636
37	Xue2014_set37	Up	0.00588991	0.0200011	128	75	0.586
11	Xue2014_set11	Up	0.00716033	0.0219285	154	98	0.636
39	Xue2014_set39	Up	0.0274842	0.0792191	125	69	0.552
12	Xue2014_set12	Up	0.0357195	0.0972363	93	55	0.591
49	Xue2014_set49	Up	0.0433796	0.111874	20	13	0.65
21	Xue2014_set21	Up	0.0553903	0.129244	83	46	0.554
38	Xue2014_set38	Up	0.0545905	0.129244	636	321	0.505
7	Xue2014_set07	Down	0.0733367	0.144898	70	15	0.214
16	Xue2014_set16	Up	0.0798419	0.144898	59	34	0.576
18	Xue2014_set18	Up	0.0761952	0.144898	179	100	0.559
28	Xue2014_set28	Up	0.0678713	0.144898	46	27	0.587
35	Xue2014_set35	Up	0.0686345	0.144898	70	36	0.514
42	Xue2014_set42	Up	0.0775613	0.144898	143	79	0.552
22	Xue2014_set22	Down	0.0993499	0.173862	93	31	0.333
36	Xue2014_set36	Up	0.127673	0.215723	63	34	0.54
46	Xue2014_set46	Up	0.133769	0.218489	150	78	0.52
34	Xue2014_set34	Up	0.158491	0.250519	179	93	0.52
29	Xue2014_set29	Down	0.180043	0.27569	33	13	0.394
14	Xue2014_set14	Up	0.204082	0.30303	65	32	0.492
45	Xue2014_set45	Up	0.211344	0.304583	427	205	0.48
3	Xue2014_set03	Up	0.231979	0.315749	466	238	0.511
40	Xue2014_set40	Up	0.230537	0.315749	125	67	0.536
20	Xue2014_set20	Up	0.350515	0.408934	39	23	0.59
32	Xue2014_set32	Up	0.343387	0.408934	342	159	0.465
33	Xue2014_set33	Up	0.327388	0.408934	69	34	0.493
41	Xue2014_set41	Up	0.346399	0.408934	54	23	0.426
43	Xue2014_set43	Up	0.313382	0.408934	131	68	0.519
48	Xue2014_set48	Up	0.349883	0.408934	237	115	0.485
44	Xue2014_set44	Up	0.417046	0.475239	67	36	0.537
47	Xue2014_set47	Down	0.540113	0.60149	147	58	0.395
31	Xue2014_set31	Up	0.680916	0.741442	79	37	0.468
8	Xue2014_set08	Down	0.712442	0.74787	87	32	0.368
15	Xue2014_set15	Down	0.717344	0.74787	91	40	0.44
4	Xue2014_set04	Down	0.93923	0.947939	61	26	0.426
30	Xue2014_set30	Down	0.947939	0.947939	280	123	0.439
